# Supplementary material for: Daphnia magna Multigeneration Exposure to Carbendazim: Gene Transcription Responses
Source: MDPI journal article supplement (doi:10.3390/toxics11110918), 2023-11-10
Supplement: s1 [file s1]

**Table S1.** Full list of differentially transcribed genes. F0 vs. F12 generation of *Daphnia magna* are compared: a) clean medium (Clean/Control) (73 up-regulated and 62 down-regulated genes), and b) carbendazim (CBZ) (119 up-regulated and 87 down-regulated genes). Up-regulation was considered whenever the fold change was higher than 1.5, whereas down-regulation was considered whenever the fold change was below -1.5. The arrows refer to up- (↑) or down-regulated (↓) genes.

**a) F0 vs. F12 Clean medium**

| Gene ID      | Gene description [species]                                                                                                              | Clean (Fold change) |
|--------------|-----------------------------------------------------------------------------------------------------------------------------------------|---------------------|
| AAV34845     | ribosomal protein L34 [ <i>Bombyx mori</i> (domestic silkworm) ]                                                                        | ↑ 16.29             |
| EAA07972     | MMSA_ANOGA AGAP002499-PA [ <i>Anopheles gambiae</i> str. PEST ]                                                                         | ↑ 13.23             |
| XP_392882    | calcyphosin-like protein-like [ <i>Apis mellifera</i> (honey bee) ]                                                                     | ↑ 12.78             |
| AAF86906     | triose phosphate/phosphate translocator precursor [ <i>Mesembryanthemum crystallinum</i> ]                                              | ↑ 12.51             |
| AAQ22478     | PlexB Plexin B [ <i>Drosophila melanogaster</i> (fruit fly) ]                                                                           | ↑ 11.79             |
| NP_652184    | oxidase. Probable cytochrome c oxidase subunit 7A, mitochondrial [ <i>Drosophila melanogaster</i> ]                                     | ↑ 11.62             |
| AAV91371     | hypothetical protein 3 [ <i>Lonomia obliqua</i> ]                                                                                       | ↑ 11.45             |
| CAE56378     | Hypothetical protein CBG24057 [ <i>Caenorhabditis briggsae</i> ]                                                                        | ↑ 10.48             |
| XP_700569    | PREDICTED: similar to alpha-2-macroglobulin receptor [ <i>Danio rerio</i> ]                                                             | ↑ 10.43             |
| XP_393411    | ubiquitin-conjugating enzyme E2 variant 2-like [ <i>Apis mellifera</i> (honey bee) ]                                                    | ↑ 9.78              |
| XP_797717    | Golgi SNAP receptor complex member 1 [ <i>Strongylocentrotus purpuratus</i> (purple sea urchin) ]                                       | ↑ 9.72              |
| AAV63979     | cathepsin L1 precursor [ <i>Artemia parthenogenetica</i> ]                                                                              | ↑ 9.63              |
| XP_605435    | PREDICTED: similar to exophilin 5 [ <i>Bos taurus</i> ]                                                                                 | ↑ 9.62              |
| XP_392758    | S-phase kinase-associated protein 1 [ <i>Apis mellifera</i> (honey bee) ]                                                               | ↑ 9.54              |
| AAC05908     | cytochrome oxidase subunit II [ <i>Pieris rapae</i> ]                                                                                   | ↑ 9.14              |
| EAR94332     | hypothetical protein THERM_00049470 [ <i>Tetrahymena thermophila</i> ]                                                                  | ↑ 9.11              |
| EAT38914     | AAEL009235-PA [ <i>Aedes aegypti</i> (yellow fever mosquito) ]                                                                          | ↑ 9.02              |
| XP_968978    | PREDICTED: similar to intracellular membrane-associated calcium-independent phospholipase A2 gamma [ <i>Tribolium castaneum</i> ]       | ↑ 9.01              |
| XP_001072503 | PREDICTED: similar to putative MAPK activating protein PM20,PM21 isoform 1 [ <i>Rattus norvegicus</i> ]                                 | ↑ 8.75              |
| DAA04586     | TPA: TPA_inf: RTN3-A2 [ <i>Oncorhynchus mykiss</i> ]                                                                                    | ↑ 8.19              |
| XP_757724    | G-protein coupled receptor [ <i>Ustilago maydis</i> ]                                                                                   | ↑ 7.92              |
| AAI16802     | melanoma antigen family B, 18 [ <i>Mus musculus</i> (house mouse) ]                                                                     | ↑ 7.89              |
| ZP_01120123  | hypothetical protein RB2501_07115 [ <i>Robiginitalea biformata</i> ]                                                                    | ↑ 7.81              |
| NP_571006    | solute carrier family 39 (zinc transporter), member 7 [ <i>Danio rerio</i> ]                                                            | ↑ 7.81              |
| XP_623241    | growth hormone-inducible transmembrane protein-like [ <i>Apis mellifera</i> (honey bee) ]                                               | ↑ 7.78              |
| BAB21109     | elongation factor 1 delta [ <i>Bombyx mori</i> (domestic silkworm) ]                                                                    | ↑ 7.72              |
| AAM44044     | ferritin 2 [ <i>Apriona germari</i> ]                                                                                                   | ↑ 7.64              |
| XP_967422    | DNA replication licensing factor Mcm7 [ <i>Tribolium castaneum</i> (red flour beetle) ]                                                 | ↑ 7.32              |
| ABD19264     | cytochrome b [ <i>Daphnia pulex</i> ]                                                                                                   | ↑ 7.32              |
| AAL27467     | TRL10 [human herpesvirus 5]                                                                                                             | ↑ 7.02              |
| XP_534308    | immunoglobulin receptor superfamily, protein phosphatase, immunoglobulin superfamily cell adhesion molecule [ <i>Canis familiaris</i> ] | ↑ 6.98              |
| CAG08737     | unnamed protein product [ <i>Tetraodon nigroviridis</i> ]                                                                               | ↑ 6.66              |
| XP_756287    | family/subfamily: TRNA-DIHYDROURIDINE(16/17) SYNTHASE [NAD(P)(+)]-LIKE (PTHR11082:SF5) [ <i>Ustilago maydis</i> ]                       | ↑ 6.64              |
| CAF89999     | unnamed protein product [ <i>Tetraodon nigroviridis</i> ]                                                                               | ↑ 6.53              |
| AAC28351     | cytochrome P450 [ <i>Homarus americanus</i> ]                                                                                           | ↑ 6.40              |
| NP_648180    | CG13675-PA [ <i>Drosophila melanogaster</i> ]                                                                                           | ↑ 6.31              |
| AAS93718     | CG30022 [ <i>Drosophila melanogaster</i> (fruit fly) ]                                                                                  | ↑ 6.17              |
| BAD32189     | Nup160 nucleoporin 160 [ <i>Mus musculus</i> (house mouse) ]                                                                            | ↑ 6.13              |
| XP_455853    | hypothetical protein [ <i>Kluyveromyces lactis</i> ]                                                                                    | ↑ 5.93              |
| NP_503838    | G-protein coupled receptor. [ <i>Caenorhabditis elegans</i> ]                                                                           | ↑ 5.77              |
| CAJ19121     | vitellogenin receptor [ <i>Blattella germanica</i> ]                                                                                    | ↑ 5.54              |
| ZP_01117305  | Zebrafish DNA sequence from clone CH211-69O18 in linkage group 16, complete sequence                                                    | ↑ 5.53              |

| XP_394275   | nucleolar GTP-binding 1-like protein [ <i>Apis mellifera</i> (honey bee) ]                                                                      | ↑ 5.35              |
|-------------|-------------------------------------------------------------------------------------------------------------------------------------------------|---------------------|
| EAA08205    | AGAP002490-PA [ <i>Anopheles gambiae</i> ]                                                                                                      | ↑ 5.28              |
| CAG01996    | unnamed protein product [ <i>Tetraodon nigroviridis</i> ]                                                                                       | ↑ 5.23              |
| Gene ID     | Gene description [species]                                                                                                                      | Clean (Fold change) |
| AAH18737    | brain protein I3 [ <i>Homo sapiens</i> (human) ]                                                                                                | ↑ 5.09              |
| AAH62838    | hydroxysteroid dehydrogenase like 2 [ <i>Danio rerio</i> (zebrafish) ]                                                                          | ↑ 5.03              |
| CAG01937    | unnamed protein product [ <i>Tetraodon nigroviridis</i> ]                                                                                       | ↑ 5.02              |
| XP_973337   | homocysteine-responsive endoplasmic reticulum-resident ubiquitin-like domain member 2 protein [ <i>Tribolium castaneum</i> (red flour beetle) ] | ↑ 4.85              |
| EAA05974    | ribosomal protein S3a [ <i>Tribolium castaneum</i> (red flour beetle) ]                                                                         | ↑ 4.72              |
| CAG05006    | unnamed protein product [ <i>Tetraodon nigroviridis</i> ]                                                                                       | ↑ 4.70              |
| XP_966633   | histone deacetylase Rpd3 [ <i>Tribolium castaneum</i> (red flour beetle) ].                                                                     | ↑ 4.54              |
| CAJ02875    | hypothetical protein [ <i>Leishmania major</i> ]                                                                                                | ↑ 4.40              |
| AAM09808    | Sec31p [ <i>Yarrowia lipolytica</i> ]                                                                                                           | ↑ 4.10              |
| ZP_01231398 | hypothetical protein CdifQ_02001672 [ <i>Clostridium difficile</i> ]                                                                            | ↑ 4.06              |
| XP_360078   | predicted protein [ <i>Magnaporthe grisea</i> ]                                                                                                 | ↑ 3.97              |
| XP_953782   | TA16735 hypothetical protein [ <i>Theileria annulata</i> ]                                                                                      | ↑ 3.89              |
| XP_827581   | hypothetical protein [ <i>Trypanosoma brucei brucei</i> ]                                                                                       | ↑ 3.82              |
| ABA25160    | transposase [ <i>Anabaena variabilis</i> ]                                                                                                      | ↑ 3.47              |
| YP_511438   | FAD dependent oxidoreductase [ <i>Jannaschia</i> sp.]                                                                                           | ↑ 3.47              |
| EAR85282    | phospholipid-translocating P-type ATPase, flippase family protein [ <i>Tetrahymena thermophila</i> ]                                            | ↑ 3.35              |
| XP_973543   | polypeptide N-acetylgalactosaminyltransferase 5 [ <i>Tribolium castaneum</i> (red flour beetle)]                                                | ↑ 3.21              |
| XP_623167   | PREDICTED: similar to ENSANGP00000026584 [ <i>Apis mellifera</i> ]                                                                              | ↑ 3.16              |
| XP_972276   | dolichyl pyrophosphate Man9GlcNAc2 alpha-1,3-glucosyltransferase [ <i>Tribolium castaneum</i> (red flour beetle) ]                              | ↑ 3.15              |
| EAT43025    | AAEL005513-PA [ <i>Aedes aegypti</i> (yellow fever mosquito) ]                                                                                  | ↑ 2.97              |
| CAF23258    | hypothetical protein [ <i>Candidatus Protochlamydia amoebophila</i> ]                                                                           | ↑ 2.90              |
| AAX55746    | low mass masquerade-like protein [ <i>Pacifastacus leniusculus</i> ]                                                                            | ↑ 2.62              |
| EAA04645    | AGAP007365-PA [ <i>Anopheles gambiae</i> ]                                                                                                      | ↑ 2.61              |
| XP_855127   | PREDICTED: hypothetical protein XP_850034 [ <i>Canis familiaris</i> ]                                                                           | ↑ 2.51              |
| YP_547797   | hypothetical protein [ <i>Polaromonas</i> sp.]                                                                                                  | ↑ 2.26              |
| AAM12270    | GH12942p [ <i>Drosophila melanogaster</i> ]                                                                                                     | ↑ 1.93              |
| EAL28826    | Dpse\GA19957 [ <i>Drosophila pseudoobscura pseudoobscura</i> ]                                                                                  | ↑ 1.85              |
| XP_393169   | beta-catenin-like protein 1-like [ <i>Apis mellifera</i> (honey bee) ]                                                                          | ↑ 1.76              |

| Gene ID      | Gene description [species]                                                                                                                                                                     | Clean (Fold change) |
|--------------|------------------------------------------------------------------------------------------------------------------------------------------------------------------------------------------------|---------------------|
| AAH77956     | dymeclin [ <i>Xenopus laevis</i> (African clawed frog)]                                                                                                                                        | ↓ -1.97             |
| XP_001071588 | PREDICTED: similar to keratin associated protein 10-10 isoform 1 [ <i>Rattus norvegicus</i> ]                                                                                                  | ↓ -2.04             |
| XP_688421    | PREDICTED: similar to peroxisomal biogenesis factor 14 [ <i>Danio rerio</i> ]                                                                                                                  | ↓ -2.24             |
| AAZ75599     | CRISP-ENH2 [ <i>Enhydra polylepis</i> ]                                                                                                                                                        | ↓ -2.41             |
| AAK52091     | Cth cystathionine gamma-lyase [ <i>Rattus norvegicus</i> (Norway rat) ]                                                                                                                        | ↓ -2.48             |
| XP_813347    | UDP-glucuronosyl and UDP-glucosyl transferase [ <i>Trypanosoma cruzi</i> ]                                                                                                                     | ↓ -2.53             |
| XP_644052    | thioredoxin peroxidase [ <i>Dictyostelium discoideum</i> AX4 ]                                                                                                                                 | ↓ -2.57             |
| EAA04524     | AGAP007120-PA [ <i>Anopheles gambiae</i> str. PEST ]                                                                                                                                           | ↓ -2.60             |
| NP_200066    | family/subfamily: Dentin sialophosphoprotein-related protein [ <i>Arabidopsis thaliana</i> ]                                                                                                   | ↓ -2.67             |
| XP_640534    | GMP synthetase [ <i>Dictyostelium discoideum</i> ]                                                                                                                                             | ↓ -2.91             |
| CAE73165     | Hypothetical protein CBG20561 [ <i>Caenorhabditis briggsae</i> ]                                                                                                                               | ↓ -3.05             |
| XP_799186    | similar to Angiotensin-converting enzyme, testis-specific isoform precursor (ACE-T) (Dipeptidyl carboxypeptidase I) (Kininase II) [ <i>Strongylocentrotus purpuratus</i> (purple sea urchin) ] | ↓ -3.16             |
| XP_746198    | hypothetical protein [ <i>Plasmodium chabaudi chabaudi</i> ]                                                                                                                                   | ↓ -3.17             |
| CAC95124     | TIR/NBS/LRR protein [ <i>Populus deltoides</i> ]                                                                                                                                               | ↓ -3.37             |
| Q8WPJ2       | FSU_1166 pseudo [ <i>Fibrobacter succinogenes</i> ]                                                                                                                                            | ↓ -3.41             |
| ABD33303     | hypothetical protein MtrDRAFT_AC158502g12v1 [ <i>Medicago truncatula</i> ]                                                                                                                     | ↓ -3.76             |
| AAL05973     | peroxinectin [ <i>Penaeus monodon</i> ]                                                                                                                                                        | ↓ -3.88             |
| EAS35804     | CIMG_Q01158 hypothetical protein [ <i>Coccidioides immitis</i> RS ]                                                                                                                            | ↓ -4.36             |
| XP_971851    | PREDICTED: similar to NADH-ubiquinone oxidoreductase 42 kDa subunit,                                                                                                                           | ↓ -4.53             |

|             | mitochondrial precursor (Complex I-42KD) (CI-42KD) [ <i>Tribolium castaneum</i> ]                       |                     |
|-------------|---------------------------------------------------------------------------------------------------------|---------------------|
| AAU18227    | hypothetical protein [ <i>Bacillus cereus</i> ]                                                         | ↓ -4.92             |
| ABG63070    | 50S ribosomal protein L2 [ <i>Chelativorans</i> sp.]                                                    | ↓ -4.50             |
| XP_765680   | hypothetical protein TP01_0153 [ <i>Theileria parva</i> ]                                               | ↓ -6.88             |
| XP_785823   | PREDICTED: similar to dispatched homolog 1 [ <i>Strongylocentrotus purpuratus</i> ]                     | ↓ -8.52             |
| BAB95816    | truncated hypothetical protein, similar to integrase [ <i>Staphylococcus aureus</i> ]                   | ↓ -11.03            |
| Gene ID     | Gene description [species]                                                                              | Clean (Fold change) |
| EAT48380    | AAEL000585-PA [ <i>Aedes aegypti</i> (yellow fever mosquito) ]                                          | ↓ -15.29            |
| XP_392710   | vam6/Vps39-like protein-like [ <i>Apis mellifera</i> (honey bee) ]                                      | ↓ -21.04            |
| AAT61403    | prolyl oligopeptidase [ <i>Bacillus thuringiensis</i> ]                                                 | ↓ -2187.35          |
| CAG04404    | unnamed protein product [ <i>Tetraodon nigroviridis</i> ]                                               | ↓ -5409.11          |
| AAZ45366    | Daro_0609 peptidase M23B [ <i>Dechloromonas aromatica</i> ]                                             | ↓ -9110.36          |
| NP_922637   | Os10g0550300 [ <i>Oryza sativa Japonica Group</i> ]                                                     | ↓ -10936.32         |
| AAH90827    | protease, serine, 60.2 [ <i>Danio rerio</i> (zebrafish) ]                                               | ↓ -15512.09         |
| XP_465194   | putative speckle-type POZ protein [ <i>Oryza sativa</i> (japonica cultivar-group) ]                     | ↓ -16218.71         |
| CAJ28140    | CD9 antigen [ <i>Dasyatis akajei</i> ]                                                                  | ↓ -18236.02         |
| NP_014128   | non-motor actin binding protein [ <i>Saccharomyces cerevisiae</i> ]                                     | ↓ -21296.16         |
| BAE56654    | unnamed protein product [ <i>Aspergillus oryzae</i> ]                                                   | ↓ -24885.83         |
| AAH74846    | transmembrane protease, serine 3 [ <i>Homo sapiens</i> (human)]                                         | ↓ -25489.30         |
| AA54998     | IP06749p [ <i>Drosophila melanogaster</i> ]                                                             | ↓ -27711.51         |
| P36308      | Outer capsid protein VP4 (Hemagglutinin) [ <i>Caenorhabditis elegans</i> ]                              | ↓ -28918.30         |
| XP_624252   | histone-lysine N-methyltransferase trr [ <i>Apis mellifera</i> (honey bee) ]                            | ↓ -31266.20         |
| CAG76660    | ECA_RS18580 hypothetical protein [ <i>Pectobacterium atrosepticum</i> ]                                 | ↓ -33727.01         |
| AAS53787    | AGOS_AFR416C AFR416Cp [ <i>Ashbya gossypii</i> ]                                                        | ↓ -37790.57         |
| CAD51508    | PFE0715w asparagine-tRNA ligase, putative [ <i>Plasmodium falciparum</i> 3D7 ]                          | ↓ -39926.89         |
| ZP_00637578 | hypothetical protein SfriDRAFT_3544 [ <i>Shewanella frigidimarina</i> ]                                 | ↓ -45161.62         |
| AAM74161    | Pax-6 protein [ <i>Euprymna scolopes</i> ]                                                              | ↓ -46398.67         |
| AAW88416    | Serpentine receptor, class bc (class b-like) protein 36 [ <i>Caenorhabditis elegans</i> ]               | ↓ -53891.71         |
| ABG52939    | Tery_3906 hypothetical protein [ <i>Trichodesmium erythraeum</i> IMS101 ]                               | ↓ -60067.61         |
| EAL26781    | Dpse\GA20714 [ <i>Drosophila pseudoobscura pseudoobscura</i> ]                                          | ↓ -66170.96         |
| EAR91277    | transmembrane protein, putative [ <i>Tetrahymena thermophila</i> SB210 ]                                | ↓ -74204.27         |
| NP_008814   | NADH dehydrogenase subunit 6 [ <i>Mustelus manazo</i> (starspotted smooth-hound) ]                      | ↓ -79749.44         |
| XP_736601   | hypothetical protein [ <i>Plasmodium chabaudi chabaudi</i> ]                                            | ↓ -82206.53         |
| AAZ69264    | MBAR_RS01565 hypothetical protein [ <i>Methanosarcina barkeri</i> ]                                     | ↓ -85847.78         |
| ABG52453    | Tery_3351 peptidase M23B [ <i>Trichodesmium erythraeum</i> ]                                            | ↓ -87307.18         |
| XP_665805   | hypothetical protein [ <i>Cryptosporidium hominis</i> ]                                                 | ↓ -88792.28         |
| AAH88813    | lectin, galactoside-binding, soluble, 9B [ <i>Xenopus (Silurana) tropicalis</i> (western clawed frog) ] | ↓ -114447.56        |
| AAT64428    | pMGA 1.4 [ <i>Mycoplasma gallisepticum</i> ] haemagglutinin homologue                                   | ↓ -114453.63        |
| EAT40951    | AAEL007376-PA [ <i>Aedes aegypti</i> (yellow fever mosquito) ]                                          | ↓ -119236.95        |
| YP_476405   | CYB_0141 hypothetical protein [ <i>Synechococcus</i> sp. JA-2-3B'a(2-13) ]                              | ↓ -129500.50        |
| CAA17132    | putative protein [ <i>Arabidopsis thaliana</i> ]                                                        | ↓ -137110.85        |
| CAD67790    | double stranded RNA-activated protein kinase 1 [ <i>Tetraodon nigroviridis</i> ]                        | ↓ -147548.17        |
| ZP_00370063 | conserved hypothetical protein [ <i>Campylobacter upsaliensis</i> ]                                     | ↓ -151124.91        |
| XP_827078   | hypothetical protein [ <i>Trypanosoma brucei brucei</i> ]                                               | ↓ -171478.98        |
| BAD94515    | peroxisome proliferator-activated receptor gamma [ <i>Oncorhynchus keta</i> ]                           | ↓ -194969.42        |

#### b) F0 vs. F12 carbendazim

| Gene ID     | Gene description [species]                                                                  | CBZ (fold change) |
|-------------|---------------------------------------------------------------------------------------------|-------------------|
| XP_700169   | PREDICTED: similar to conserved hypothetical protein [ <i>Danio rerio</i> ]                 | ↑ 83178.68        |
| ZP_01011697 | outer membrane lipoprotein Blc [ <i>Rhodobacterales bacterium</i> ]                         | ↑ 75647.24        |
| XP_500810   | SEC16, ISOFORM F; hypothetical protein [ <i>Yarrowia lipolytica</i> ]                       | ↑ 65357.29        |
| AAM51523    | Hypothetical protein C28G1.6 [ <i>Caenorhabditis elegans</i> ]                              | ↑ 38447.13        |
| XP_765680   | hypothetical protein TP01_0153 [ <i>Theileria parva</i> ]                                   | ↑ 16642.07        |
| AAQ75727    | NADH dehydrogenase I [ <i>Errhonus variabilis</i> ]                                         | ↑ 13302.91        |
| XP_784306   | PREDICTED: similar to placental protein 11 related [ <i>Strongylocentrotus purpuratus</i> ] | ↑ 6822.25         |
| AAN73266    | polyprotein [Tick-borne encephalitis virus]                                                 | ↑ 5696.41         |

| AAH81106     | MGC83377 protein [ <i>Xenopus laevis</i> ]; solute carrier family 5 (sodium/glucose cotransporter), member 2                                   | ↑14.93            |
|--------------|------------------------------------------------------------------------------------------------------------------------------------------------|-------------------|
| CAD43195     | disrupted in schizophrenia 1 protein [ <i>Danio rerio</i> ]                                                                                    | ↑ 10.50           |
| EAL25204     | GA13016-PA [ <i>Drosophila pseudoobscura</i> ]                                                                                                 | ↑ 9.75            |
| XP_829305    | tyrosine phosphatase [ <i>Trypanosoma brucei</i> ]                                                                                             | ↑ 8.79            |
| AAK41879     | Conserved hypothetical protein [ <i>Sulfolobus solfataricus</i> ]                                                                              | ↑ 8.10            |
| ZP_00120785  | COG2378: Predicted transcriptional regulator [ <i>Bifidobacterium longum</i> ]                                                                 | ↑ 7.77            |
| XP_874527    | PREDICTED: similar to keratin associated protein 10-7 [ <i>Bos taurus</i> ]                                                                    | ↑ 7.52            |
| EAT35209     | 4-aminobutyrate aminotransferase [ <i>Aedes aegypti</i> ]                                                                                      | ↑ 7.41            |
| Gene ID      | Gene description [species]                                                                                                                     | CBZ (fold change) |
| EAL28674     | GA15521-PA [ <i>Drosophila pseudoobscura</i> ]                                                                                                 | ↑ 7.30            |
| XP_971017    | PREDICTED: zinc transporter ZIP11 isoform X2 [ <i>Tribolium castaneum</i> ]                                                                    | ↑ 7.15            |
| XP_973490    | PREDICTED: similar to CG2918-PA [ <i>Tribolium castaneum</i> ]; hypoxia up-regulated protein 1                                                 | ↑ 7.07            |
| NP_039078    | Ankyrin repeat gene family protein [ <i>Fowlpox virus</i> ]                                                                                    | ↑ 6.68            |
| EAA10981     | ENSANGP00000011510 [ <i>Anopheles gambiae</i> ]                                                                                                | ↑ 6.51            |
| CAA73128     | Irp3 protein [ <i>Yersinia enterocolitica</i> ]                                                                                                | ↑ 6.43            |
| XP_974201    | 39S ribosomal protein L44, mitochondrial                                                                                                       | ↑ 6.20            |
| AAV34884     | ribosomal protein S27 [ <i>Bombyx mori</i> ]                                                                                                   | ↑ 6.12            |
| XP_500452    | hypothetical protein [ <i>Yarrowia lipolytica</i> ]                                                                                            | ↑ 6.08            |
| XP_421566    | PREDICTED: similar to MAWD binding protein (Unknown protein 32 from 2D-page of liver tissue) [ <i>Gallus gallus</i> ]                          | ↑ 5.74            |
| EAT34816     | glycine cleavage system h protein [ <i>Aedes aegypti</i> ]                                                                                     | ↑ 5.60            |
| AAC27659     | tryptophan oxygenase [ <i>Anopheles gambiae</i> ]                                                                                              | ↑ 5.22            |
| XP_975769    | cytochrome b-c1 complex subunit 2, mitochondrial [ <i>Tribolium castaneum</i> ]                                                                | ↑ 5.13            |
| ABF94587     | Cystatin, putative [ <i>Oryza sativa</i> (japonica cultivar-group)]                                                                            | ↑ 4.92            |
| XP_974675    | zinc transporter ZIP1 [ <i>Tribolium castaneum</i> ]                                                                                           | ↑ 4.82            |
| XP_361380    | hypothetical protein MG03854.4 [ <i>Magnaporthe grisea</i> 70-15]                                                                              | ↑ 4.74            |
| AAT74669     | cysteine-rich secreted protein 3 [ <i>Mesocostoides vogae</i> ]                                                                                | ↑ 4.64            |
| XP_969056    | ubiquitin carboxyl-terminal hydrolase 14 [ <i>Tribolium castaneum</i> (red flour beetle) ]                                                     | ↑ 4.73            |
| XP_966449    | PREDICTED: similar to CG10092-PA [ <i>Tribolium castaneum</i> ]                                                                                | ↑ 4.72            |
| EAT36570     | alcohol dehydrogenase [ <i>Aedes aegypti</i> ]                                                                                                 | ↑ 4.72            |
| EAR99683     | Pre-mRNA cleavage complex II protein Clp1, putative; hypothetical protein THERM_00590200 [ <i>Tetrahymena thermophila</i> SB210]               | ↑ 4.71            |
| XP_001102209 | PREDICTED: similar to Methylmalonyl-CoA epimerase, mitochondrial precursor (DL-methylmalonyl-CoA racemase) isoform 1 [ <i>Macaca mulatta</i> ] | ↑ 4.68            |
| AAZ14281     | proteophosphoglycan 5 [ <i>Leishmania</i> major strain Friedlin]                                                                               | ↑ 4.67            |
| XP_809835    | subtilisin-like serine peptidase [ <i>Trypanosoma cruzi</i> strain CL Brener]                                                                  | ↑ 4.62            |
| ABA02335     | NADH dehydrogenase subunit 2 [ <i>Daphnia magna</i> ]                                                                                          | ↑ 4.59            |
| XP_797537    | PREDICTED: similar to membrane protein mKirre [ <i>Strongylocentrotus purpuratus</i> ]                                                         | ↑ 4.57            |
| XP_967940    | PREDICTED: similar to sideroflexin 2 [ <i>Tribolium castaneum</i> ]                                                                            | ↑ 4.57            |
| ABF51294     | NADPH-specific isocitrate dehydrogenase                                                                                                        | ↑ 4.51            |
| YP_473323    | ORF135 peptide [Hyphantria cunea nucleopolyhedrovirus]                                                                                         | ↑ 4.51            |
| EAS03884     | Viral A-type inclusion protein repeat containing protein [ <i>Tetrahymena thermophila</i> ]                                                    | ↑ 4.43            |
| CAG31427     | annexin A11                                                                                                                                    | ↑ 4.39            |
| AAH90678     | hypothetical protein [ <i>Danio rerio</i> ]                                                                                                    | ↑ 4.36            |
| XP_646129    | putative Nek family protein kinase [ <i>Dictyostelium discoideum</i> ]                                                                         | ↑ 4.31            |
| XP_393344    | PREDICTED: similar to hypothetical protein 18 [ <i>Apis mellifera</i> ]                                                                        | ↑ 4.27            |
| CAC44629     | deafness dystonia protein [ <i>Takifugu rubripes</i> ]                                                                                         | ↑ 4.18            |
| AAH95821     | Snx9l protein; monooxygenase, DBH-like 1, like [ <i>Danio rerio</i> (zebrafish) ]                                                              | ↑ 4.17            |
| EAS36540     | DNA polymerase epsilon catalytic subunit A [ <i>Coccidioides immitis</i> ]                                                                     | ↑ 4.10            |
| AAR37644     | molybdopterin-guanine dinucleotide biosynthesis protein [uncultured bacterium 439]                                                             | ↑ 4.07            |
| AAR04057     | sulfatase FP1b [ <i>Danio rerio</i> ]                                                                                                          | ↑ 4.05            |
| AAX24666     | SJCHGC03634 protein [ <i>Schistosoma japonicum</i> ]                                                                                           | ↑ 4.04            |
| XP_392990    | PREDICTED: similar to CG8385-PB, isoform B [ <i>Apis mellifera</i> ]                                                                           | ↑ 4.04            |
| XP_397355    | transmembrane protein 64-like [ <i>Apis mellifera</i> ]                                                                                        | ↑ 3.99            |
| AAS94231     | legumain-like protease precursor [ <i>Ixodes ricinus</i> ]                                                                                     | ↑ 3.97            |
| BAC98829     | F-box WD40 protein [ <i>Labidochromis caeruleus</i> ]                                                                                          | ↑ 3.89            |
| XP_791484    | PREDICTED: similar to beta-1,4-mannosyltransferase, partial [ <i>Strongylocentrotus purpuratus</i> ]                                           | ↑ 3.84            |
| XP_966285    | DNA polymerase epsilon catalytic subunit A [ <i>Plasmodium falciparum</i> ]                                                                    | ↑ 3.83            |

| BAB74771     | alr3072 [ <i>Nostoc</i> sp. PCC 7120]                                                                                                                   | ↑ 3.81            |
|--------------|---------------------------------------------------------------------------------------------------------------------------------------------------------|-------------------|
| XP_967132    | PREDICTED: similar to CG6016-PB, isoform B isoform 1 [ <i>Tribolium castaneum</i> ]                                                                     | ↑ 3.81            |
| XP_502986    | hypothetical protein [ <i>Yarrowia lipolytica</i> ]                                                                                                     | ↑ 3.79            |
| EAT45353     | conserved hypothetical protein [ <i>Aedes aegypti</i> ]                                                                                                 | ↑ 3.78            |
| ABA94886     | Leucine Rich Repeat family protein, expressed [ <i>Oryza sativa</i> (japonica cultivar-group)]                                                          | ↑ 3.76            |
| XP_001075301 | PREDICTED: similar to CG13731-PA [ <i>Rattus norvegicus</i> ]                                                                                           | ↑ 3.75            |
| AAH77956     | dymedlin [ <i>Xenopus laevis</i> (African clawed frog)]                                                                                                 | ↑ 3.71            |
| XP_623472    | PREDICTED: similar to ENSANGP00000024947 [ <i>Apis mellifera</i> ]                                                                                      | ↑ 3.68            |
| XP_975592    | programmed cell death protein 6 [ <i>Tribolium castaneum</i> (red flour beetle) ];<br>PREDICTED: similar to CG40410-PA.3 [ <i>Tribolium castaneum</i> ] | ↑ 3.67            |
| XP_829735    | hypothetical protein Tb11.01.8530 [ <i>Trypanosoma brucei</i> TREU927]                                                                                  | ↑ 3.63            |
| Gene ID      | Gene description [species]                                                                                                                              | CBZ (fold change) |
| XP_541754    | guanyl-nucleotide exchange factor [ <i>Canis familiaris</i> ]                                                                                           | ↑ 3.58            |
| XP_393519    | PREDICTED: similar to fatty acid-biding protein [ <i>Apis mellifera</i> ]                                                                               | ↑ 3.56            |
| XP_971885    | PREDICTED: similar to CG9762-PA [ <i>Tribolium castaneum</i> ]                                                                                          | ↑ 3.56            |
| EAL34060     | GA18149-PA [ <i>Drosophila pseudoobscura</i> ]                                                                                                          | ↑ 3.50            |
| ZP_01103786  | conserved hypothetical protein [gamma proteobacterium KT 71]                                                                                            | ↑ 3.47            |
| XP_541851    | PREDICTED: similar to Stabilin-1 precursor (FEEL-1 protein) (MS-1 antigen) [ <i>Canis familiaris</i> ]                                                  | ↑ 3.45            |
| XP_393525    | PREDICTED: similar to GA20008-PA [ <i>Apis mellifera</i> ]                                                                                              | ↑ 3.44            |
| AAH24612     | basic transcription factor 3-like 4 [ <i>Mus musculus</i> (house mouse) ]                                                                               | ↑ 3.43            |
| EAT40746     | conserved hypothetical protein [ <i>Aedes aegypti</i> ]                                                                                                 | ↑ 3.37            |
| XP_623417    | PREDICTED: similar to ENSANGP00000021084 [ <i>Apis mellifera</i> ]                                                                                      | ↑ 3.35            |
| AAK25797     | delta-9 desaturase 3 [ <i>Acheta domesticus</i> ]                                                                                                       | ↑ 3.31            |
| CAJ17256     | ribosomal protein L10Ae [ <i>Biphyllus lunatus</i> ]                                                                                                    | ↑ 3.25            |
| AAH42230     | Ribosomal protein S1a protein [ <i>Xenopus laevis</i> ]                                                                                                 | ↑ 3.23            |
| ZP_01376161  | hypothetical protein Ccur5_01001129 [ <i>Campylobacter curvus</i> 525.92]                                                                               | ↑ 3.16            |
| XP_001076360 | PREDICTED: similar to retinoblastoma binding protein 6 isoform 1 isoform 2 [ <i>Rattus norvegicus</i> ]                                                 | ↑ 3.16            |
| XP_971417    | ATP synthase mitochondrial F1 complex assembly factor 1 [ <i>Tribolium castaneum</i> (red flour beetle) ]                                               | ↑ 3.10            |
| CAG00408     | unnamed protein product [ <i>Tetraodon nigroviridis</i> ]                                                                                               | ↑ 3.05            |
| ZP_01029146  | hypothetical protein Badol_01000893 [ <i>Bifidobacterium adolescentis</i> ]                                                                             | ↑ 2.99            |
| XP_691505    | PREDICTED: similar to obscurin, cytoskeletal calmodulin and titin-interacting RhoGEF [ <i>Danio rerio</i> ]                                             | ↑ 2.98            |
| CAE68115     | Hypothetical protein CBG13758 [ <i>Caenorhabditis briggsae</i> ]                                                                                        | ↑ 2.85            |
| EAA05425     | ENSANGP00000012700 [ <i>Anopheles gambiae</i> str. PEST]                                                                                                | ↑ 2.81            |
| EAT44525     | Niemann-Pick Type C-2, putative [ <i>Aedes aegypti</i> ]                                                                                                | ↑ 2.79            |
| AAS55566     | MST84DC [ <i>Drosophila simulans</i> ]                                                                                                                  | ↑ 2.78            |
| NP_079004    | succinyl-CoA:glutarate-CoA transferase [ <i>Homo sapiens</i> (human)]                                                                                   | ↑ 2.66            |
| CAI86921     | conserved protein of unknown function ; putative membrane protein [ <i>Pseudoalteromonas haloplanktis</i> TAC125]                                       | ↑ 2.65            |
| AAH44037     | Cg8286-prov protein [ <i>Xenopus laevis</i> ]                                                                                                           | ↑ 2.65            |
| YP_258141    | hypothetical protein PFL_1010 [ <i>Pseudomonas fluorescens</i> Pf-5]                                                                                    | ↑ 2.62            |
| XP_549134    | PREDICTED: similar to sushi-repeat-containing protein, X-linked 2 [ <i>Canis familiaris</i> ]                                                           | ↑ 2.58            |
| AAQ23388     | Rab7 [ <i>Aiptasia pulchella</i> ]                                                                                                                      | ↑ 2.56            |
| EAA12881     | AGAP007952-PA [ <i>Anopheles gambiae</i> str. PEST]                                                                                                     | ↑ 2.55            |
| BAB05837     | BH2118 [ <i>Bacillus halodurans</i> C-125]                                                                                                              | ↑ 2.53            |
| XP_636901    | RING zinc finger-containing protein [ <i>Dictyostelium discoideum</i> AX4 ]                                                                             | ↑ 2.53            |
| ZP_00131989  | COG3106: Predicted ATPase [ <i>Haemophilus somnus</i> 2336]                                                                                             | ↑ 2.44            |
| EAT48619     | serine/threonine-protein kinase vrk [ <i>Aedes aegypti</i> ]                                                                                            | ↑ 2.40            |
| CAC95124     | TIR/NBS/LRR protein [ <i>Populus deltoides</i> ]                                                                                                        | ↑ 2.38            |
| XP_699475    | PREDICTED: similar to Sympk protein [ <i>Danio rerio</i> ]                                                                                              | ↑ 2.31            |
| XP_980893    | PREDICTED: hypothetical protein LOC442837 [ <i>Mus musculus</i> ]                                                                                       | ↑ 2.27            |
| XP_511735    | PREDICTED: similar to hypothetical protein FLJ22175 [ <i>Pan troglodytes</i> ]                                                                          | ↑ 2.19            |
| EAA00702     | AGAP011988-PA [ <i>Anopheles gambiae</i> str. PEST]                                                                                                     | ↑ 2.15            |
| XP_625439    | insulinase like peptidase [ <i>Cryptosporidium parvum</i> Iowa II]                                                                                      | ↑ 2.12            |
| AAD50987     | prothymosin a14 [ <i>Homo sapiens</i> ]                                                                                                                 | ↑ 2.10            |
| XP_973265    | ribosome biogenesis protein BOP1 homolog [ <i>Tribolium castaneum</i> (red flour beetle) ]                                                              | ↑ 2.08            |
| EAA13751     | AGAP010769-PA                                                                                                                                           | ↑ 1.94            |

|           |                                                                                |        |
|-----------|--------------------------------------------------------------------------------|--------|
| NP_649657 | Zinc-finger protein [ <i>Drosophila melanogaster</i> (fruit fly) ]             | ↑ 1.75 |
| EAS00551  | hypothetical protein TTHERM_00409040 [ <i>Tetrahymena thermophila</i> SB210 ]  | ↑ 1.73 |
| XP_710938 | Potential fungal zinc cluster transcription factor [ <i>Candida albicans</i> ] | ↑ 1.73 |
| XP_686827 | PREDICTED: similar to Bmp1 protein [ <i>Danio rerio</i> ]                      | ↑ 1.56 |

| Gene ID      | Gene description [species]                                                                                                     | CBZ (Fold change) |
|--------------|--------------------------------------------------------------------------------------------------------------------------------|-------------------|
| NP_872312    | melanoma antigen family B10 [ <i>Homo sapiens</i> (human) ]                                                                    | ↓ -1.57           |
| XP_971465    | PREDICTED: similar to Tubulin tyrosine ligase-like protein 2 (Testis-specific protein NYD-TSPG) [ <i>Tribolium castaneum</i> ] | ↓ -1.63           |
| AAN36896     | conserved Plasmodium protein, unknown function [ <i>Plasmodium falciparum</i> 3D7 ]                                            | ↓ -1.71           |
| BAE73006     | hypothetical protein [ <i>Macaca fascicularis</i> ]                                                                            | ↓ -1.71           |
| EAT47168     | serine protease [ <i>Aedes aegypti</i> ]                                                                                       | ↓ -1.89           |
| Gene ID      | Gene description [species]                                                                                                     | CBZ (Fold change) |
| NP_001026467 | serine/arginine-rich splicing factor 11 [ <i>Gallus gallus</i> (chicken) ]                                                     | ↓ -1.89           |
| NP_523475    | Salivary gland secretion 1 CG3047-PA [ <i>Drosophila melanogaster</i> ]                                                        | ↓ -1.96           |
| XP_678020    | Triops cancriformis mitochondrial DNA, complete genome [ <i>Plasmodium berghei</i> ]                                           | ↓ -2.04           |
| EAR83186     | WD domain, G-beta repeat protein [ <i>Tetrahymena thermophila</i> SB210 ]                                                      | ↓ -2.20           |
| CAE61304     | Hypothetical protein CBG05137 [ <i>Caenorhabditis briggsae</i> ]                                                               | ↓ -2.23           |
| XP_991669    | PREDICTED: similar to pericardin CG5700-PB [ <i>Mus musculus</i> ]                                                             | ↓ -2.70           |
| AAO12215     | trypsin [ <i>Aplysina fistularis</i> ]                                                                                         | ↓ -3.13           |
| ZP_01223527  | 4-carboxy-2-hydroxymuconate-6-semialdehyde dehydrogenase [marine gamma proteobacterium HTCC2207]                               | ↓ -3.16           |
| EAS02587     | AMP-binding enzyme family protein [ <i>Tetrahymena thermophila</i> SB210 ]                                                     | ↓ -3.43           |
| BAD63461     | phage-related protein [ <i>Bacillus clausii</i> KSM-K16 ]                                                                      | ↓ -3.48           |
| CAA20431     | GTPase regulator (predicted) [ <i>Schizosaccharomyces pombe</i> 972h- ]                                                        | ↓ -3.70           |
| ZP_01034049  | His/Glu/Gln/Arg/opine family ABC transporter, permease protein [ <i>Roseovarius</i> sp. 217 ]                                  | ↓ -3.71           |
| ZP_01133737  | lipase, putative [ <i>Pseudoalteromonas tunicata</i> D2 ]                                                                      | ↓ -3.80           |
| AAH85561     | Hypothetical protein [ <i>Danio rerio</i> ]                                                                                    | ↓ -3.84           |
| XP_969486    | PREDICTED: similar to Jagged-1 precursor (Jagged1) [ <i>Tribolium castaneum</i> ]                                              | ↓ -4.03           |
| NP_611397    | CG15111-PA, isoform A [ <i>Drosophila melanogaster</i> ]                                                                       | ↓ -4.09           |
| XP_971073    | AP-1 complex subunit sigma-2 [ <i>Tribolium castaneum</i> (red flour beetle) ]                                                 | ↓ -4.12           |
| XP_970811    | vesicle transport protein SEC20 [ <i>Tribolium castaneum</i> (red flour beetle) ]                                              | ↓ -4.17           |
| XP_624856    | BTB/POZ domain-containing protein KCTD5-like [ <i>Apis mellifera</i> (honey bee) ]                                             | ↓ -4.18           |
| XP_380554    | Hypothetical protein FG00378.1 [ <i>Gibberella zeae</i> PH-1 ]                                                                 | ↓ -4.21           |
| XP_392015    | PREDICTED: similar to CG31116-PC, isoform C [ <i>Apis mellifera</i> ]                                                          | ↓ -4.22           |
| XP_426719    | PREDICTED: similar to seven in absentia homolog 2; seven in absentia [ <i>Drosophila</i> ]                                     | ↓ -4.46           |
| ZP_01304133  | xylosidase/arabinosidase [ <i>Sphingomonas</i> sp. SKA58 ]                                                                     | ↓ -4.54           |
| XP_523482    | PREDICTED: hypothetical protein [ <i>Pan troglodytes</i> ]                                                                     | ↓ -4.56           |
| AAD55141     | di-domain hemoglobin precursor [ <i>Daphnia pulex</i> ]                                                                        | ↓ -4.61           |
| XP_623750    | myotrophin-like [ <i>Apis mellifera</i> (honey bee) ]                                                                          | ↓ -4.85           |
| XP_397115    | PREDICTED: similar to ENSANGP00000014264 [ <i>Apis mellifera</i> ]                                                             | ↓ -4.98           |
| EAL17999     | hypothetical protein [ <i>Cryptococcus neoformans</i> var. <i>neoformans</i> B-3501A ]                                         | ↓ -4.98           |
| BAE38837     | Zranb2 zinc finger, RAN-binding domain containing 2 [ <i>Mus musculus</i> (house mouse) ]                                      | ↓ -5.08           |
| XP_995118    | PREDICTED: hypothetical protein [ <i>Mus musculus</i> ]                                                                        | ↓ -5.14           |
| AAO27090     | CTP synthase [ <i>Buchnera aphidicola</i> str. Bp (Baizongia pistaciae) ]                                                      | ↓ -5.20           |
| EAA09458     | AGAP005124-PA [ <i>Anopheles gambiae</i> str. <i>PEST</i> ]                                                                    | ↓ -5.25           |
| XP_394551    | NEDD8-conjugating enzyme UBE2F-like [ <i>Apis mellifera</i> (honey bee) ]                                                      | ↓ -5.26           |
| XP_549046    | PREDICTED: similar to hephaestin isoform a [ <i>Canis familiaris</i> ]                                                         | ↓ -5.26           |
| EAT46404     | conserved hypothetical protein [ <i>Aedes aegypti</i> ]                                                                        | ↓ -5.36           |
| XP_966534    | ethanolamine-phosphate cytidyltransferase [ <i>Tribolium castaneum</i> (red flour beetle) ]                                    | ↓ -5.37           |
| EAT43058     | AAEL005474-PA [ <i>Aedes aegypti</i> (yellow fever mosquito) ]                                                                 | ↓ -5.40           |
| NP_650751    | CG7718 [ <i>Drosophila melanogaster</i> ]                                                                                      | ↓ -5.42           |
| AAS48991     | UL112/113 [ <i>Human herpesvirus</i> 5 ]                                                                                       | ↓ -5.47           |
| BAB21109     | Ef-1d elongation factor 1 delta [ <i>Bombyx mori</i> (domestic silkworm) ]                                                     | ↓ -5.51           |
| EAL26005     | Dpse\GA14100 [ <i>Drosophila pseudoobscura pseudoobscura</i> ]                                                                 | ↓ -5.60           |
| EAT38914     | AAEL009235-PA [ <i>Aedes aegypti</i> (yellow fever mosquito) ]                                                                 | ↓ -5.64           |

| CAA84321     | Hypothetical protein F45H7.1 [ <i>Caenorhabditis elegans</i> ]                                                 | ↓ -5.66           |
|--------------|----------------------------------------------------------------------------------------------------------------|-------------------|
| XP_455853    | unnamed protein product [ <i>Kluyveromyces lactis</i> ]                                                        | ↓ -5.88           |
| ABB06938     | FAD dependent oxidoreductase [ <i>Burkholderia</i> sp. 383]                                                    | ↓ -6.10           |
| CAH90002     | EIF4A2 eukaryotic translation initiation factor 4A2 [ <i>Pongo abelii</i> (Sumatran orangutan) ]               | ↓ -6.21           |
| CAK11279     | novel protein similar to vertebrate topoisomerase (DNA) II beta 180kDa (TOP2B) [ <i>Danio rerio</i> ]          | ↓ -6.54           |
| XP_682935    | Uncharacterized protein. Subfamily: SOLUTE CARRIER FAMILY 35 MEMBER F1 (PTHR14233:SF10) [ <i>Danio rerio</i> ] | ↓ -6.55           |
| XP_796182    | PREDICTED: similar to SHQ1 homolog [ <i>Strongylocentrotus purpuratus</i> ]                                    | ↓ -6.22           |
| ABF51368     | H <sup>+</sup> transporting ATP synthase O subunit [ <i>Bombyx mori</i> (domestic silkworm) ]                  | ↓ -6.64           |
| XP_785816    | PREDICTED: similar to muscle Y-box protein YB2 [ <i>Strongylocentrotus purpuratus</i> ]                        | ↓ -6.66           |
| EAS03921     | HMG box protein [ <i>Tetrahymena thermophila</i> SB210 ]                                                       | ↓ -6.68           |
| XP_967013    | PREDICTED: similar to CG9160-PA, isoform A [ <i>Tribolium castaneum</i> ]                                      | ↓ -6.77           |
| ZP_01065094  | hypothetical protein MED222_15549 [ <i>Vibrio</i> sp. MED222]                                                  | ↓ -6.84           |
| XP_001072503 | PREDICTED: similar to putative MAPK activating protein PM20,PM21 isoform 1 [ <i>Rattus norvegicus</i> ]        | ↓ -6.92           |
| Gene ID      | Gene description [species]                                                                                     | CBZ (Fold change) |
| CAG09120     | unnamed protein product [ <i>Tetraodon nigroviridis</i> ]                                                      | ↓ -7.05           |
| YP_258814    | cytochrome c-type biogenesis protein Cych [ <i>Pseudomonas fluorescens</i> Pf-5]                               | ↓ -7.13           |
| XP_973533    | malate dehydrogenase, mitochondrial [ <i>Tribolium castaneum</i> (red flour beetle) ]                          | ↓ -7.14           |
| AAH76191     | thoc7 THO complex 7 [ <i>Danio rerio</i> (zebrafish) ]                                                         | ↓ -7.15           |
| CAF94261     | unnamed protein product [ <i>Tetraodon nigroviridis</i> ]                                                      | ↓ -7.20           |
| CAG05207     | unnamed protein product [ <i>Tetraodon nigroviridis</i> ]                                                      | ↓ -7.30           |
| XP_976221    | PREDICTED: similar to CG4944-PB, isoform B isoform 2 [ <i>Tribolium castaneum</i> ]                            | ↓ -7.33           |
| XP_968064    | 40S ribosomal protein S3a [ <i>Tribolium castaneum</i> (red flour beetle) ]                                    | ↓ -7.36           |
| NP_077791    | lipoic acid synthetase [ <i>Mus musculus</i> ]                                                                 | ↓ -7.49           |
| AAV31414     | 26S protease regulatory subunit-like protein [ <i>Toxoptera citricida</i> ]                                    | ↓ -7.65           |
| AAX28551     | SJCHGC05463 protein [ <i>Schistosoma japonicum</i> ]                                                           | ↓ -7.66           |
| EAA08286     | ENSANGP00000017110 [ <i>Anopheles gambiae</i> str. PEST]                                                       | ↓ -7.73           |
| CAB60138     | putative polyprotein [Wheat yellow mosaic virus]                                                               | ↓ -8.05           |
| AAN37244     | conserved Plasmodium protein, unknown function [ <i>Plasmodium falciparum</i> 3D7 ]                            | ↓ -8.09           |
| CAF92521     | unnamed protein product [ <i>Tetraodon nigroviridis</i> ]                                                      | ↓ -8.50           |
| XP_974308    | metaxin-2-like [ <i>Tribolium castaneum</i> (red flour beetle) ]                                               | ↓ -8.57           |
| XP_624608    | renin receptor-like [ <i>Apis mellifera</i> (honey bee) ]                                                      | ↓ -8.83           |
| YP_052887    | ribosomal protein S7 [ <i>Saprolegnia ferax</i> ]                                                              | ↓ -8.85           |
| AAV60144     | oocyte maturation factor Mos [ <i>Anas poecilorhyncha</i> ]                                                    | ↓ -8.87           |
| XP_623241    | growth hormone-inducible transmembrane protein-like [ <i>Apis mellifera</i> (honey bee)]                       | ↓ -9.53           |
| AAK27862     | Hypothetical protein Y37E3.4 [ <i>Caenorhabditis elegans</i> ]                                                 | ↓ -9.96           |
| ZP_01120123  | hypothetical protein RB2501_07115 [Robiginitalea bifurcata HTCC2501]                                           | ↓ -12.89          |
| XP_973543    | polypeptide N-acetylgalactosaminyltransferase 5                                                                | ↓ -14.60          |
| XP_855304    | PREDICTED: similar to cyclin K [ <i>Canis familiaris</i> ]                                                     | ↓ -6377.84        |
| YP_581584    | histidine kinase [ <i>Psychrobacter cryohalolentis</i> K5]                                                     | ↓ -17088.07       |
| EAM56123     | conserved hypothetical protein [ <i>Solibacter usitatus</i> Ellin]                                             | ↓ -49456.71       |
| XP_729076    | hypothetical protein PY01338 [ <i>Plasmodium yoelii</i> yoelii]                                                | ↓ -58892.73       |
