# Supplementary material for: Daphnia magna Multigeneration Exposure to Carbendazim: Gene Transcription Responses
Source: MDPI journal article supplement (doi:10.3390/toxics11110918), 2023-11-10
Supplement: s1 [file s1]

**Table S2.** Full list of differentially transcribed genes following exposure of *Daphnia magna* to carbendazim (CBZ): a) F0 generation (191 up-regulated and 98 down-regulated genes), and b) F12 generation (53 up-regulated and 66 down-regulated genes). Up-regulation was considered whenever the fold change was higher than 1.5, whereas down-regulation was considered whenever the fold change was below -1.5. The arrows refer to up- (↑) or down-regulated (↓) genes compared to clean medium (control).

**a) F0 generation**

| Gene ID      | Gene description [species]                                                                      | CBZ (Fold change) |
|--------------|-------------------------------------------------------------------------------------------------|-------------------|
| T32007       | hypothetical protein F36H9.6 [ <i>Caenorhabditis elegans</i> ]                                  | ↑ 18.95           |
| XP_973543    | polypeptide N-acetylgalactosaminyltransferase 5 [ <i>Tribolium castaneum</i> ]                  | ↑ 18.77           |
| YP_548045    | hypothetical protein Bpro_1196, membrane protein [ <i>Polaromonas</i> sp.]                      | ↑ 18.04           |
| XP_384927    | hypothetical protein [ <i>Fusarium graminearum</i> ]                                            | ↑ 15.59           |
| XP_966633    | histone deacetylase Rpd3 [ <i>Tribolium castaneum</i> (red flour beetle)]                       | ↑ 14.83           |
| XP_785816    | PREDICTED: similar to muscle Y-box protein YB2 [ <i>Strongylocentrotus purpuratus</i> ]         | ↑ 14.83           |
| YP_052887    | rps7 ribosomal protein S7 [ <i>Saprolegnia ferax</i> ]                                          | ↑ 14.18           |
| NP_001018342 | tas2r203 taste receptor, type 2, member 203 [ <i>Danio rerio</i> (zebrafish)]                   | ↑ 14.01           |
| XP_393137    | UPF0183 protein CG7083-like [ <i>Apis mellifera</i> (honey bee)]                                | ↑ 13.92           |
| ZP_00592874  | GCN5-related N-acetyltransferase [ <i>Prosthecochloris aestuarii</i> ]                          | ↑ 13.72           |
| AAH76191     | thoc7 THO complex 7 [ <i>Danio rerio</i> (zebrafish)]                                           | ↑ 13.27           |
| XP_755614    | AFUA_2G12830 UDP-glucosyl transferase family protein [ <i>Aspergillus fumigatus</i> ]           | ↑ 13.07           |
| YP_660772    | hypothetical protein [ <i>Pseudoalteromonas atlantica</i> ]                                     | ↑ 12.85           |
| XP_392758    | S-phase kinase-associated protein 1 [ <i>Apis mellifera</i> (honey bee)]                        | ↑ 12.75           |
| EAT38914     | AAEL009235-PA [ <i>Aedes aegypti</i> (yellow fever mosquito)]                                   | ↑ 12.49           |
| AAV34845     | Rpl34 ribosomal protein L34 [ <i>Bombyx mori</i> (domestic silkworm)]                           | ↑ 12.20           |
| CAG10013     | unnamed protein product [ <i>Tetraodon nigroviridis</i> ]                                       | ↑ 12.18           |
| CAG01937     | unnamed protein product [ <i>Tetraodon nigroviridis</i> ]                                       | ↑ 12.18           |
| XP_397060    | uncharacterized [ <i>Apis mellifera</i> (honey bee)]                                            | ↑ 12.04           |
| AAH62838     | hsdl2 hydroxysteroid dehydrogenase like 2 [ <i>Danio rerio</i> (zebrafish)]                     | ↑ 12.00           |
| BAE38837     | Zranb2 zinc finger, RAN-binding domain containing 2 [ <i>Mus musculus</i> (house mouse)]        | ↑ 11.90           |
| AAX28551     | SJCHGC05463 protein [ <i>Schistosoma japonicum</i> ]                                            | ↑ 11.84           |
| XP_623241    | growth hormone-inducible transmembrane protein-like [ <i>Apis mellifera</i> (honey bee)]        | ↑ 11.75           |
| BAB21109     | Ef-1d elongation factor 1 delta [ <i>Bombyx mori</i> (domestic silkworm)]                       | ↑ 11.59           |
| AAC28351     | cytochrome P450 [ <i>Homarus americanus</i> ]                                                   | ↑ 11.59           |
| XP_455853    | hypothetical protein [ <i>Kluyveromyces lactis</i> ]                                            | ↑ 11.44           |
| XP_970811    | vesicle transport protein SEC20 [ <i>Tribolium castaneum</i> (red flour beetle)]                | ↑ 11.42           |
| ZP_01120123  | hypothetical protein RB2501_07115 [ <i>Robiginitalea biformata</i> ]                            | ↑ 11.15           |
| AAH41737     | eif5 eukaryotic translation initiation factor 5 [ <i>Xenopus laevis</i> (African clawed frog)]  | ↑ 10.81           |
| XP_363794    | hypothetical protein MG01720.4 [ <i>Magnaporthe grisea</i> ]                                    | ↑ 10.58           |
| XP_971073    | AP-1 complex subunit sigma-2 [ <i>Tribolium castaneum</i> (red flour beetle)]                   | ↑ 10.55           |
| AAQ22478     | PlexB Plexin B [ <i>Drosophila melanogaster</i> (fruit fly)]                                    | ↑ 10.53           |
| XP_623750    | myotrophin-like [ <i>Apis mellifera</i> (honey bee)]                                            | ↑ 10.48           |
| EAA07972     | MMSA_ANOGA AGAP002499-PA [ <i>Anopheles gambiae</i> str. PEST]                                  | ↑ 10.37           |
| NP_503838    | G-protein coupled receptor. Protein C50H11.13. species: <i>Caenorhabditis elegans</i>           | ↑ 10.36           |
| AAN37244     | PF14_0631 conserved Plasmodium protein, unknown function [ <i>Plasmodium falciparum</i> ]       | ↑ 10.33           |
| ABF51517     | legumaturain [ <i>Bombyx mori</i> (domestic silkworm)]                                          | ↑ 10.31           |
| XP_397115    | PREDICTED: similar to ENSANGP00000014264 [ <i>Apis mellifera</i> ]                              | ↑ 10.29           |
| ZP_01117305  | Zebrafish DNA sequence from clone CH211-69O18 in linkage group 16, complete sequence            | ↑ 10.21           |
| EAL26005     | Dpse\GA14100 [ <i>Drosophila pseudoobscura pseudoobscura</i> ]                                  | ↑ 10.13           |
| EAS03921     | TTHERM_00455600 HMG box protein [ <i>Tetrahymena thermophila</i> ]                              | ↑ 10.12           |
| EAT48786     | AaeL_AAEL000159 AAEL000159-PA [ <i>Aedes aegypti</i> (yellow fever mosquito)]                   | ↑ 10.04           |
| AAI16802     | Mageb18 melanoma antigen family B, 18 [ <i>Mus musculus</i> (house mouse)]                      | ↑ 9.90            |
| EAA10370     | ENSANGP00000025920 [ <i>Anopheles gambiae</i> str. PEST]                                        | ↑ 9.89            |
| XP_624856    | BTB/POZ domain-containing protein KCTD5-like [ <i>Apis mellifera</i> (honey bee)]               | ↑ 9.87            |
| CAH90002     | EIF4A2 eukaryotic translation initiation factor 4A2 [ <i>Pongo abelii</i> (Sumatran orangutan)] | ↑ 9.85            |
| ZP_01233257  | hypothetical protein VAS14_10384 [ <i>Vibrio angustum</i> ]                                     | ↑ 9.80            |
| EAA05974     | 40S ribosomal protein S3a [ <i>Tribolium castaneum</i> (red flour beetle)]                      | ↑ 9.74            |

| AAY63979     | glycerol-3-phosphate dehydrogenase [ <i>Lysiphlebus testaceipes</i> ]                                                                                                                                                        | ↑ 9.74            |
|--------------|------------------------------------------------------------------------------------------------------------------------------------------------------------------------------------------------------------------------------|-------------------|
| XP_479530    | putative potassium transporter [ <i>Oryza sativa</i> (japonica cultivar-group)]                                                                                                                                              | ↑ 9.56            |
| Gene ID      | Gene description [species]                                                                                                                                                                                                   | CBZ (Fold change) |
| AAS91007     | slowmo [ <i>Bombyx mori</i> (domestic silkworm)]                                                                                                                                                                             | ↑ 9.41            |
| XP_793079    | transcription factor AP-1-like [ <i>Strongylocentrotus purpuratus</i> (purple sea urchin)]                                                                                                                                   | ↑ 9.40            |
| XP_968064    | 40S ribosomal protein S3a [ <i>Tribolium castaneum</i> (red flour beetle)]                                                                                                                                                   | ↑ 9.34            |
| NP_652184    | oxidase. Probable cytochrome c oxidase subunit 7A, mitochondrial [ <i>Drosophila melanogaster</i> ]                                                                                                                          | ↑ 9.31            |
| XP_850642    | PREDICTED: similar to GDP-mannose pyrophosphorylase B isoform 2 isoform 2 [ <i>Canis familiaris</i> ]                                                                                                                        | ↑ 9.28            |
| P25169       | Sodium/potassium-transporting ATPase subunit beta (Sodium/potassium-dependent ATPase beta subunit) [ <i>Artemia</i> sp.] Na+/K+-exchanging ATPase (EC 3.6.3.9) beta chain - brine shrimp                                     | ↑ 9.28            |
| XP_397220    | Surf1 surfait 1 [ <i>Apis mellifera</i> (honey bee)]                                                                                                                                                                         | ↑ 9.27            |
| XP_700569    | PREDICTED: similar to alpha-2-macroglobulin receptor [ <i>Danio rerio</i> (zebrafish)]                                                                                                                                       | ↑ 9.27            |
| CAD70781     | hypothetical protein [ <i>Neurospora crassa</i> ]                                                                                                                                                                            | ↑ 9.11            |
| XP_953782    | TA16735 hypothetical protein [ <i>Theileria annulata</i> strain Ankara]                                                                                                                                                      | ↑ 9.06            |
| EAT43245     | stretch regulated skeletal muscle protein, putative [ <i>Aedes aegypti</i> ]                                                                                                                                                 | ↑ 9.02            |
| XP_797717    | Golgi SNAP receptor complex member 1 [ <i>Strongylocentrotus purpuratus</i> (purple sea urchin)]                                                                                                                             | ↑ 8.93            |
| XP_604956    | NPAT nuclear protein, ataxia-telangiectasia locus [ <i>Bos taurus</i> (cattle)]                                                                                                                                              | ↑ 8.89            |
| XP_682935    | solute carrier family 35 member F1 [ <i>Danio rerio</i> ]                                                                                                                                                                    | ↑ 8.86            |
| ZP_01065094  | hypothetical protein MED222_15549 [ <i>Vibrio</i> sp.]                                                                                                                                                                       | ↑ 8.79            |
| XP_751302    | AFUA_6G14280 flavin-binding monooxygenase-like protein [ <i>Aspergillus fumigatus</i> ]                                                                                                                                      | ↑ 8.75            |
| EAA08286     | ENSANGP00000017110 [ <i>Anopheles gambiae</i> str]                                                                                                                                                                           | ↑ 8.62            |
| BAD18123     | DESAT4 fatty acid desaturase [ <i>Bombyx mori</i> (domestic silkworm)]                                                                                                                                                       | ↑ 8.57            |
| EAR91724     | TTHERM_00396960 kinase domain protein [ <i>Tetrahymena thermophila</i> ]                                                                                                                                                     | ↑ 8.54            |
| CAF94261     | unnamed protein product [ <i>Tetraodon nigroviridis</i> ]                                                                                                                                                                    | ↑ 8.35            |
| AAC79426     | phosphate transport protein [ <i>Choristoneura fumiferana</i> ]                                                                                                                                                              | ↑ 8.30            |
| ZP_01223527  | 4-carboxy-2-hydroxy-muconate-6-semialdehyde dehydrogenase [marine gamma proteobacterium]                                                                                                                                     | ↑ 8.28            |
| CAE67987     | Hypothetical protein CBG13597 [ <i>Caenorhabditis briggsae</i> ]                                                                                                                                                             | ↑ 8.15            |
| AAN79130     | Bacteriophage N4 adsorption protein B [ <i>Escherichia coli</i> ]                                                                                                                                                            | ↑ 8.06            |
| EAA07158     | AgaP_AGAP010476 AGAP010476-PA [ <i>Anopheles gambiae</i> str. PEST]                                                                                                                                                          | ↑ 8.05            |
| XP_624608    | renin receptor-like [ <i>Apis mellifera</i> (honey bee)]                                                                                                                                                                     | ↑ 8.00            |
| AAK27862     | Hypothetical protein Y37E3.4 [ <i>Caenorhabditis elegans</i> ]                                                                                                                                                               | ↑ 8.00            |
| XP_791551    | cytochrome c1, heme protein, mitochondrial [ <i>Strongylocentrotus purpuratus</i> (purple sea urchin)]                                                                                                                       | ↑ 7.97            |
| XP_973533    | malate dehydrogenase, mitochondrial [ <i>Tribolium castaneum</i> (red flour beetle)]                                                                                                                                         | ↑ 7.80            |
| ZP_00510523  | Cell division FtsK/SpoIIIE protein [ <i>Clostridium thermocellum</i> ]                                                                                                                                                       | ↑ 7.60            |
| BAD63461     | phage-related protein [ <i>Bacillus clausii</i> ]                                                                                                                                                                            | ↑ 7.59            |
| XP_967013    | PREDICTED: similar to CG9160-PA, isoform A [ <i>Tribolium castaneum</i> ]                                                                                                                                                    | ↑ 7.59            |
| XP_966534    | ethanolamine-phosphate cytidyltransferase [ <i>Tribolium castaneum</i> (red flour beetle)]                                                                                                                                   | ↑ 7.58            |
| CAF97221     | unnamed protein product [ <i>Tetraodon nigroviridis</i> ]                                                                                                                                                                    | ↑ 7.55            |
| AAX57282     | CT099 [ <i>Lycopersicon peruvianum</i> ]                                                                                                                                                                                     | ↑ 7.53            |
| XP_974308    | metaxin-2-like [ <i>Tribolium castaneum</i> (red flour beetle)]                                                                                                                                                              | ↑ 7.48            |
| NP_077791    | Lipoyl synthase, mitochondrial [ <i>Mus musculus</i> ]                                                                                                                                                                       | ↑ 7.47            |
| XP_995118    | PREDICTED: similar to CG13957-PA [ <i>Mus musculus</i> ]                                                                                                                                                                     | ↑ 7.45            |
| XP_392882    | calcyphosin-like protein-like [ <i>Apis mellifera</i> (honey bee)]                                                                                                                                                           | ↑ 7.38            |
| XP_967422    | DNA replication licensing factor Mcm7 [ <i>Tribolium castaneum</i> (red flour beetle)]                                                                                                                                       | ↑ 7.34            |
| AAY60144     | oocyte maturation factor Mos [ <i>Anas poecilorhyncha</i> ]                                                                                                                                                                  | ↑ 7.30            |
| ZP_00134041  | COG1444: Predicted P-loop ATPase fused to an acetyltransferase [ <i>Actinobacillus pleuropneumoniae</i> ]                                                                                                                    | ↑ 7.26            |
| XP_679830    | hypothetical protein [ <i>Plasmodium berghei</i> ANKA]                                                                                                                                                                       | ↑ 7.25            |
| NP_723776    | Vha68-2 CG3762-PC, isoform C; ATP synthase, anion channel, ligand-gated ion channel, DNA binding protein, hydrolase. Subfamily: V-type proton atpase catalytic subunit A (PTHR15184:SF7). [ <i>Drosophila melanogaster</i> ] | ↑ 7.19            |
| EAS00570     | cyclic nucleotide-binding domain protein [ <i>Tetrahymena thermophila</i> ]                                                                                                                                                  | ↑ 7.09            |
| XP_624674    | translocon-associated protein subunit gamma-like [ <i>Apis mellifera</i> (honey bee)]                                                                                                                                        | ↑ 7.04            |
| XP_393411    | ubiquitin-conjugating enzyme E2 variant 2-like [ <i>Apis mellifera</i> (honey bee)]                                                                                                                                          | ↑ 6.98            |
| XP_623978    | PREDICTED: similar to ENSANGP00000011134 [ <i>Apis mellifera</i> (honey bee)]                                                                                                                                                | ↑ 6.93            |
| AAI14116     | Solute carrier family 25 (mitochondrial thiamine pyrophosphate carrier), member 19 [ <i>Bos taurus</i> (cattle)]                                                                                                             | ↑ 6.87            |
| AAO27090     | CTP synthase [ <i>Buchnera aphidicola</i> str]                                                                                                                                                                               | ↑ 6.82            |
| XP_001072503 | PREDICTED: similar to putative MAPK activating protein PM20,PM21 isoform 1 [ <i>Rattus norvegicus</i> ]                                                                                                                      | ↑ 6.79            |

| EAA12371    | AGAP008234-PA [ <i>Anopheles gambiae</i> str. PEST]                                                                    | ↑ 6.60            |
|-------------|------------------------------------------------------------------------------------------------------------------------|-------------------|
| ABF51368    | H <sup>+</sup> transporting ATP synthase O subunit [ <i>Bombyx mori</i> (domestic silkworm)]                           | ↑ 6.37            |
| XP_973734   | myosin-2 essential light chain [ <i>Tribolium castaneum</i> (red flour beetle)]                                        | ↑ 6.34            |
| Gene ID     | Gene description [species]                                                                                             | CBZ (Fold change) |
| XP_681269   | hypothetical protein [ <i>Aspergillus nidulans</i> ]                                                                   | ↑ 6.32            |
| XP_790964   | copine-8 [ <i>Strongylocentrotus purpuratus</i> (purple sea urchin)]                                                   | ↑ 6.26            |
| BAC60471    | fadJ multifunctional fatty acid oxidation complex subunit alpha [ <i>Vibrio parahaemolyticus</i> ]                     | ↑ 6.24            |
| ZP_01304133 | xylosidase/arabinosidase [ <i>Sphingomonas</i> sp.]                                                                    | ↑ 6.21            |
| XP_672403   | PB300124.00.0 hypothetical protein [ <i>Plasmodium berghei</i> ANKA]                                                   | ↑ 6.20            |
| XP_392015   | chloride channel protein 2 [ <i>Apis mellifera</i> (honey bee)]                                                        | ↑ 6.17            |
| YP_581567   | Pcryo_2306 putative DNA helicase [ <i>Psychrobacter cryohalolentis</i> ]                                               | ↑ 6.09            |
| XP_725993   | PY05524 hypothetical protein [ <i>Plasmodium yoelii yoelii</i> 17XNL ]                                                 | ↑ 6.05            |
| XP_969486   | PREDICTED: similar to Jagged-1 precursor (Jagged1) [ <i>Tribolium castaneum</i> ]                                      | ↑ 6.00            |
| EAT43058    | AAEL005474-PA [ <i>Aedes aegypti</i> (yellow fever mosquito)]                                                          | ↑ 5.98            |
| BAE02066    | uncharacterized [ <i>Macaca fascicularis</i> (crab-eating macaque)]                                                    | ↑ 5.87            |
| BAB77866    | alr1500 hypothetical protein [ <i>Nostoc</i> sp.]                                                                      | ↑ 5.85            |
| ABB06938    | FAD dependent oxidoreductase [ <i>Burkholderia lata</i> ]                                                              | ↑ 5.83            |
| CAG09120    | unnamed protein product [ <i>Tetraodon nigroviridis</i> ]                                                              | ↑ 5.80            |
| ABC73068    | venom allergen 5 [ <i>Vespula maculifrons</i> ]                                                                        | ↑ 5.78            |
| ABD19264    | cytochrome b [ <i>Daphnia pulex</i> ]                                                                                  | ↑ 5.76            |
| AAB31526    | O-type P element protein {exons 0-3} [ <i>Drosophila bifasciata</i> ]                                                  | ↑ 5.76            |
| AAC05908    | cytochrome oxidase subunit II [ <i>Pieris rapae</i> ]                                                                  | ↑ 5.71            |
| CAB05290    | hypothetical protein T27E7.3 T27E7.3 [ <i>Caenorhabditis elegans</i> ]                                                 | ↑ 5.53            |
| BAD40302    | 2-oxoacid:ferredoxin oxidoreductase alpha subunit [ <i>Symbiobacterium thermophilum</i> ]                              | ↑ 5.50            |
| CAG07432    | unnamed protein product [ <i>Tetraodon nigroviridis</i> ]                                                              | ↑ 5.49            |
| AAS93718    | CG30022 [ <i>Drosophila melanogaster</i> (fruit fly)]                                                                  | ↑ 5.46            |
| AAH85561    | Hypothetical protein [ <i>Danio rerio</i> (zebrafish)]                                                                 | ↑ 5.41            |
| ZP_01034049 | His/Glu/Gln/Arg/opine family ABC transporter, permease protein [ <i>Roseovarius</i> sp.]                               | ↑ 5.39            |
| EAA08205    | AGAP002490-PA [ <i>Anopheles gambiae</i> str. PEST]                                                                    | ↑ 5.37            |
| XP_394362   | E3 ubiquitin-protein ligase UBR1 [ <i>Apis mellifera</i> (honey bee)]                                                  | ↑ 5.36            |
| CAB05757    | SRX-29 [ <i>Caenorhabditis elegans</i> ]                                                                               | ↑ 5.36            |
| CAA10769    | hypothetical protein [ <i>Cryptosporidium parvum</i> ]                                                                 | ↑ 5.34            |
| AAS53791    | AFR420Wp [ <i>Ashbya gossypii</i> ATCC 10895] AFR420Wp [ <i>Eremothecium gossypii</i> ]                                | ↑ 5.11            |
| XP_392616   | PREDICTED: similar to ENSANGP00000021560 [ <i>Apis mellifera</i> ]                                                     | ↑ 5.11            |
| XP_723863   | PY00386 CCAAT-box DNA binding protein subunit B [ <i>Plasmodium yoelii yoelii</i> ]                                    | ↑ 5.11            |
| XP_636901   | DDB_G0288093 RING zinc finger-containing protein [ <i>Dictyostelium discoideum</i> ]                                   | ↑ 5.07            |
| CAH03604    | PTMB.407 hypothetical protein [ <i>Paramecium tetraurelia</i> strain d4-2]                                             | ↑ 5.04            |
| NP_440321   | SLI1510 protein [ <i>Synechocystis</i> ]                                                                               | ↑ 5.03            |
| XP_624692   | Glutathione S-transferase T1 [ <i>Apis mellifera</i> (honey bee)]                                                      | ↑ 5.02            |
| EAS03884    | TTHERM_00455230 hypothetical protein [ <i>Tetrahymena thermophila</i> ]                                                | ↑ 5.00            |
| Q25158      | Compound eye opsin BCRH2 opsin BcRh2 [ <i>Hemigrapsus sanguineus</i> ]                                                 | ↑ 4.87            |
| XP_394551   | NEDD8-conjugating enzyme UBE2F-like [ <i>Apis mellifera</i> (honey bee)]                                               | ↑ 4.75            |
| EAT45700    | AAEL003027-PA [ <i>Aedes aegypti</i> (yellow fever mosquito)]                                                          | ↑ 4.74            |
| XP_968298   | PREDICTED: similar to CG31543-PC, isoform C [ <i>Tribolium castaneum</i> ]                                             | ↑ 4.71            |
| XP_781103   | homogentisate 1,2-dioxygenase [ <i>Strongylocentrotus purpuratus</i> (purple sea urchin)]                              | ↑ 4.64            |
| EAA00702    | AGAP011988-PA [ <i>Anopheles gambiae</i> str. PEST ]                                                                   | ↑ 4.57            |
| EAR85282    | TTHERM_00470550 phospholipid-translocating P-type ATPase, flippase family protein [ <i>Tetrahymena thermophila</i> ]   | ↑ 4.57            |
| YP_547797   | Bpro_0943 hypothetical protein [ <i>Polaromonas</i> sp.]                                                               | ↑ 4.56            |
| AAR33556    | cytochrome c oxidase, coo3-type, cytochrome c subunit II, one heme-binding site [ <i>Geobacter sulfurreducens</i> PCA] | ↑ 4.55            |
| NP_194153   | 3-oxo-Delta(4,5)-steroid 5-beta-reductase. [ <i>Arabidopsis thaliana</i> ]                                             | ↑ 4.53            |
| ABA45367    | zinc ABC transporter ATP-binding protein [ <i>Streptococcus agalactiae</i> ]                                           | ↑ 4.47            |
| ZP_01189085 | Excinuclease ABC, A subunit [ <i>Halothermothrix orenii</i> ]                                                          | ↑ 4.44            |
| EAT43025    | AaeL_AAEL005513 AAEL005513-PA [ <i>Aedes aegypti</i> (yellow fever mosquito)]                                          | ↑ 4.44            |
| XP_710938   | Potential fungal zinc cluster transcription factor [ <i>Candida albicans</i> ]                                         | ↑ 4.40            |
| XP_751922   | aminopeptidase [ <i>Aspergillus fumigatus</i> ]                                                                        | ↑ 4.39            |
| AAT74669    | cysteine-rich secreted protein 3 [ <i>Mesocestoides vogae</i> ]                                                        | ↑ 4.39            |
| AAH19729    | Usf2 upstream transcription factor 2 [ <i>Mus musculus</i> (house mouse)]                                              | ↑ 4.29            |
| NP_648180   | CG13675-PA [ <i>Drosophila melanogaster</i> ]                                                                          | ↑ 4.03            |

| XP_958062    | NCU10014 hypothetical protein [ <i>Neurospora crassa</i> ]                                                  | ↑ 3.92            |
|--------------|-------------------------------------------------------------------------------------------------------------|-------------------|
| EAA00530     | AGAP012418-PA [ <i>Anopheles gambiae</i> str. <i>PEST</i> ]                                                 | ↑ 3.89            |
| AAV54998     | IP06749p [ <i>Drosophila melanogaster</i> ]                                                                 | ↑ 3.87            |
| BAC24521     | minC [ <i>Wigglesworthia glossinidia</i> endosymbiont of <i>Glossina brevipalpis</i> ]                      | ↑ 3.86            |
| Gene ID      | Gene description [species]                                                                                  | CBZ (Fold change) |
| XP_001069615 | PREDICTED: similar to YY1 transcription factor [ <i>Rattus norvegicus</i> ]                                 | ↑ 3.86            |
| BAC12610     | hypothetical conserved protein [ <i>Oceanobacillus iheyensis</i> HTE831]                                    | ↑ 3.69            |
| YP_629939    | MXAN_1687 hypothetical protein [ <i>Myxococcus xanthus</i> DK 1622]                                         | ↑ 3.53            |
| AAZ06578     | pAW63_007 type II intron reverse transcriptase maturase [ <i>Bacillus thuringiensis</i> serovar kurstaki]   | ↑ 3.52            |
| YP_621339    | Bcen_1460 MscS mechanosensitive ion channel [ <i>Burkholderia cenocepacia</i> ]                             | ↑ 3.48            |
| XP_392121    | papilin-like [ <i>Apis mellifera</i> (honey bee)]                                                           | ↑ 3.41            |
| AAT89163     | hypothetical protein [ <i>Leifsonia xyli</i> subsp.]                                                        | ↑ 3.39            |
| XP_763925    | TP04_0290 hypothetical protein [ <i>Theileria parva</i> strain <i>Muguga</i> ]                              | ↑ 3.36            |
| AAV66970     | secreted protein [ <i>Ixodes scapularis</i> ]                                                               | ↑ 3.30            |
| XP_695583    | similar to HYLS1 protein [ <i>Danio rerio</i> (zebrafish)]                                                  | ↑ 3.28            |
| EAA04645     | AGAP007365-PA [ <i>Anopheles gambiae</i> str. <i>PEST</i> ]                                                 | ↑ 3.24            |
| XP_785823    | PREDICTED: similar to dispatched homolog 1 [ <i>Strongylocentrotus purpuratus</i> ]                         | ↑ 3.19            |
| XP_521564    | Centrosomal protein 55kDa [ <i>Pan troglodytes</i> ]                                                        | ↑ 3.14            |
| XP_396152    | SMSr sphingomyelin synthase-related 1 [ <i>Apis mellifera</i> (honey bee)]                                  | ↑ 3.06            |
| NP_872374    | hypothetical protein [Homo sapiens]                                                                         | ↑ 3.03            |
| AAH82673     | bcat1 branched chain amino-acid transaminase 1, cytosolic [ <i>Xenopus laevis</i> (African clawed frog)]    | ↑ 2.90            |
| BAD46348     | Os09g0525400 [ <i>Oryza sativa Japonica Group</i> ]                                                         | ↑ 2.87            |
| CAG67999     | conserved hypothetical protein; putative membrane protein [ <i>Acinetobacter</i> sp. ADP1]                  | ↑ 2.83            |
| EAL33401     | GA18290-PA [ <i>Drosophila pseudoobscura</i> ]                                                              | ↑ 2.82            |
| EAT38039     | AaeL_AAEL010027 AAEL010027-PA [ <i>Aedes aegypti</i> (yellow fever mosquito) ]                              | ↑ 2.79            |
| YP_293946    | EhV192 hypothetical protein [ <i>Emiliana huxleyi</i> virus 86]                                             | ↑ 2.77            |
| EAA04917     | AgaP_AGAP000973 AGAP000973-PA [ <i>Anopheles gambiae</i> str. <i>PEST</i> ]                                 | ↑ 2.75            |
| EAL27357     | gene product from transcript GA20418-RA [ <i>Drosophila pseudoobscura</i> ]                                 | ↑ 2.47            |
| ZP_01079163  | possible helicase [ <i>Synechococcus</i> sp.]                                                               | ↑ 2.47            |
| EAT42364     | AAEL006097-PA [ <i>Aedes aegypti</i> (yellow fever mosquito)]                                               | ↑ 2.21            |
| AAT39336     | DNA repair protein RAD51 [ <i>Oikopleura dioica</i> ]                                                       | ↑ 2.20            |
| CAA93496     | ALG-1 [ <i>Caenorhabditis elegans</i> ]                                                                     | ↑ 2.17            |
| XP_952900    | TA07340 hypothetical protein [ <i>Theileria annulata</i> strain <i>Ankara</i> ]                             | ↑ 2.01            |
| EAR90129     | TTHERM_00354760 hypothetical protein [ <i>Tetrahymena thermophila</i> ]                                     | ↑ 1.89            |
| Gene ID      | Gene description [species]                                                                                  | CBZ (Fold change) |
| NP_610462    | shrb transfer/carrier protein [ <i>Drosophila melanogaster</i> ]                                            | ↓ -2.03           |
| EAS00551     | hypothetical protein TTHERM_00409040 [ <i>Tetrahymena thermophila</i> ]                                     | ↓ -2.03           |
| AAH42230     | Ribosomal protein S1a protein [ <i>Xenopus laevis</i> ]                                                     | ↓ -2.10           |
| XP_458550    | hypothetical protein DEHA0D02585g [ <i>Debaryomyces hansenii</i> ]                                          | ↓ -2.14           |
| XP_821615    | protein kinase [ <i>Trypanosoma cruzi</i> strain CL Brener]                                                 | ↓ -2.14           |
| XP_592181    | PREDICTED: similar to Y37D8A.2 isoform 1 [ <i>Bos taurus</i> ]                                              | ↓ -2.17           |
| XP_686827    | PREDICTED: similar to Bmp1 protein [ <i>Danio rerio</i> ]                                                   | ↓ -2.20           |
| XP_966285    | DNA polymerase epsilon catalytic subunit A [ <i>Plasmodium falciparum</i> ]                                 | ↓ -2.21           |
| XP_678020    | mitochondrial DNA, complete genome [ <i>Triops cancriformis</i> ]                                           | ↓ -2.21           |
| XP_541754    | guanyl-nucleotide exchange factor [ <i>Canis familiaris</i> ]                                               | ↓ -2.27           |
| XP_651053    | hypothetical protein 185.t00007 [ <i>Entamoeba histolytica</i> ]                                            | ↓ -2.27           |
| NP_079004    | succinyl-CoA:glutarate-CoA transferase [ <i>Homo sapiens</i> ]                                              | ↓ -2.30           |
| AAH97162     | F-box and leucine-rich repeat protein 18 [ <i>Danio rerio</i> ]                                             | ↓ -2.33           |
| ZP_00131989  | Predicted ATPase [ <i>Haemophilus somnus</i> ]                                                              | ↓ -2.40           |
| XP_974187    | PREDICTED: similar to CG8029-PB, isoform B [ <i>Tribolium castaneum</i> ]                                   | ↓ -2.42           |
| NP_766109    | nuclear protein in testis [ <i>Mus musculus</i> ]                                                           | ↓ -2.43           |
| XP_640534    | GMP synthetase [ <i>Dictyostelium discoideum</i> ]                                                          | ↓ -2.44           |
| AAM40505     | DNA mismatch repair protein [ <i>Xanthomonas campestris</i> ]                                               | ↓ -2.63           |
| BAC10625     | ubiquitin conjugating enzyme-like protein [ <i>Bombyx mori</i> ]                                            | ↓ -2.64           |
| BAC98829     | F-box WD40 protein [ <i>Labidochromis caeruleus</i> ]                                                       | ↓ -2.65           |
| XP_623472    | PREDICTED: similar to ENSANGP00000024947 [ <i>Apis mellifera</i> ]                                          | ↓ -2.65           |
| CAI86921     | conserved protein of unknown function ; putative membrane protein [ <i>Pseudoalteromonas haloplanktis</i> ] | ↓ -2.69           |
| CAE79263     | glutaminyI-tRNA synthetase [ <i>Bdellovibrio bacteriovorus</i> ]                                            | ↓ -2.71           |
| NP_701577    | hypothetical protein PFL1075w [ <i>Plasmodium falciparum</i> ]                                              | ↓ -2.71           |

| EAL28674     | GA15521-PA [ <i>Drosophila pseudoobscura</i> ]                                                                                                         | ↓ -2.72           |
|--------------|--------------------------------------------------------------------------------------------------------------------------------------------------------|-------------------|
| CAE66221     | Hypothetical protein CBG11463 [ <i>Caenorhabditis briggsae</i> ]                                                                                       | ↓ -2.72           |
| NP_001017150 | chromobox homolog 1 [ <i>Xenopus tropicalis</i> ]                                                                                                      | ↓ -2.77           |
| XP_393841    | PREDICTED: similar to AMME syndrome candidate gene 1 protein [ <i>Apis mellifera</i> ]                                                                 | ↓ -2.81           |
| AAT39415     | Gaba(A) receptor associated protein [ <i>Branchiostoma belcheri tsingtaunense</i> ]                                                                    | ↓ -2.83           |
| EAT36570     | alcohol dehydrogenase [ <i>Aedes aegypti</i> ]                                                                                                         | ↓ -2.86           |
| XP_624527    | repressor of RNA polymerase III transcription MAF1 homolog [ <i>Apis mellifera</i> (honey bee)]                                                        | ↓ -2.87           |
| Gene ID      | Gene description [species]                                                                                                                             | CBZ (Fold change) |
| AAD32568     | NT6 [ <i>Nicotiana tabacum</i> ]                                                                                                                       | ↓ -2.88           |
| XP_859489    | PREDICTED: similar to hydroxyacyl dehydrogenase, subunit A isoform 3 [ <i>Canis familiaris</i> ]                                                       | ↓ -2.91           |
| XP_624997    | PREDICTED: similar to oxysterol-binding protein-like protein 9 isoform d [ <i>Apis mellifera</i> ]                                                     | ↓ -3.00           |
| EAR96527     | Major Facilitator Superfamily protein [ <i>Tetrahymena thermophila</i> ]                                                                               | ↓ -3.02           |
| XP_967132    | PREDICTED: similar to CG6016-PB, isoform B isoform 1 [ <i>Tribolium castaneum</i> ]                                                                    | ↓ -3.03           |
| NP_851603    | microtubule associated serine/threonine kinase 1 [ <i>Rattus norvegicus</i> ]                                                                          | ↓ -3.03           |
| AAK41879     | Conserved hypothetical protein [ <i>Sulfolobus solfataricus</i> ]                                                                                      | ↓ -3.05           |
| NP_523530    | 60S ribosomal protein L13 RPL13 [ <i>Drosophila melanogaster</i> ]                                                                                     | ↓ -3.12           |
| XP_974675    | zinc transporter ZIP1 [ <i>Tribolium castaneum</i> ]                                                                                                   | ↓ -3.15           |
| NP_701446    | hypothetical protein PFL0405w [ <i>Plasmodium falciparum</i> ]                                                                                         | ↓ -3.20           |
| XP_361380    | hypothetical protein MG03854.4 [ <i>Magnaporthe grisea</i> ]                                                                                           | ↓ -3.26           |
| AAH50515     | WD repeat domain 8 [ <i>Danio rerio</i> ]                                                                                                              | ↓ -3.34           |
| XP_362894    | hypothetical protein MG08543.4 [ <i>Magnaporthe grisea</i> ]                                                                                           | ↓ -3.39           |
| CAA67766     | acute phase serum amyloid A (SAA) [ <i>Oncorhynchus mykiss</i> ]                                                                                       | ↓ -3.39           |
| AAH77956     | MGC80949 protein [ <i>Xenopus laevis</i> ]                                                                                                             | ↓ -3.41           |
| XP_971851    | PREDICTED: similar to NADH-ubiquinone oxidoreductase 42 kDa subunit, mitochondrial precursor (Complex I-42KD) (CI-42KD) [ <i>Tribolium castaneum</i> ] | ↓ -3.42           |
| EAT34816     | glycine cleavage system h protein [ <i>Aedes aegypti</i> ]                                                                                             | ↓ -3.45           |
| CAG31427     | annexin A11 [ <i>Gallus gallus</i> ]                                                                                                                   | ↓ -3.46           |
| XP_650833    | heat shock protein 70 [ <i>Entamoeba histolytica</i> ]                                                                                                 | ↓ -3.47           |
| YP_485288    | pyrroloquinoline-quinone aldehyde dehydrogenase [ <i>Rhodopseudomonas palustris</i> ]                                                                  | ↓ -3.49           |
| AAV34884     | ribosomal protein S27 [ <i>Bombyx mori</i> ]                                                                                                           | ↓ -3.49           |
| XP_969209    | PREDICTED: similar to sphingosine-1-phosphatase [ <i>Tribolium castaneum</i> ]                                                                         | ↓ -3.50           |
| XP_975592    | PREDICTED: similar to CG40410-PA.3 [ <i>Tribolium castaneum</i> ]                                                                                      | ↓ -3.51           |
| XP_221438    | PREDICTED: similar to Cdc42 GTPase-activating protein [ <i>Rattus norvegicus</i> ]                                                                     | ↓ -3.51           |
| CAC44629     | deafness dystonia protein [ <i>Takifugu rubripes</i> ]                                                                                                 | ↓ -3.68           |
| XP_974201    | 39S ribosomal protein L44, mitochondrial [ <i>Tribolium castaneum</i> ]                                                                                | ↓ -3.68           |
| EAA13751     | AGAP010769-PA glucosamine 6-phosphate N-acetyltransferase [ <i>Anopheles gambiae</i> str. PEST]                                                        | ↓ -3.75           |
| EAT40746     | conserved hypothetical protein [ <i>Aedes aegypti</i> ]                                                                                                | ↓ -3.78           |
| XP_975769    | cytochrome b-c1 complex subunit 2, mitochondrial [ <i>Tribolium castaneum</i> ]                                                                        | ↓ -3.79           |
| XP_001076360 | PREDICTED: similar to retinoblastoma binding protein 6 isoform 1 isoform 2 [ <i>Rattus norvegicus</i> ]                                                | ↓ -3.97           |
| XP_653493    | hypothetical protein 81.t00020 [ <i>Entamoeba histolytica</i> ]                                                                                        | ↓ -3.98           |
| XP_971017    | zinc transporter ZIP11 [ <i>Tribolium castaneum</i> ]                                                                                                  | ↓ -4.00           |
| EAL27218     | GA18926-PA [ <i>Drosophila pseudoobscura</i> ]                                                                                                         | ↓ -4.12           |
| ZP_00800575  | 4Fe-4S ferredoxin, iron-sulfur binding [ <i>Alkaliphilus metalliredigenes</i> ]                                                                        | ↓ -4.16           |
| XP_829758    | hypothetical protein Tb11.01.8780 [ <i>Trypanosoma brucei</i> ]                                                                                        | ↓ -4.22           |
| XP_726251    | hypothetical protein PY00679 [ <i>Plasmodium yoelii yoelii</i> str.]                                                                                   | ↓ -4.24           |
| BAD94515     | peroxisome proliferator-activated receptor gamma [ <i>Oncorhynchus keta</i> ]                                                                          | ↓ -4.33           |
| CAD67790     | No homology                                                                                                                                            | ↓ -4.39           |
| BAB05837     | hypothetical protein BH2118 [ <i>Bacillus halodurans</i> ]                                                                                             | ↓ -4.41           |
| AAT42372     | glycogen synthase kinase-3 [ <i>Lytechinus variegatus</i> ]                                                                                            | ↓ -4.74           |
| XP_001102209 | PREDICTED: similar to Methylmalonyl-CoA epimerase, mitochondrial precursor (DL-methylmalonyl-CoA racemase) isoform 1 [ <i>Macaca mulatta</i> ]         | ↓ -4.75           |
| AAC27659     | tryptophan oxygenase [ <i>Anopheles gambiae</i> ]                                                                                                      | ↓ -4.85           |
| NP_039078    | ORF FVP115 Ankyrin repeat gene family protein [ <i>Fowlpox virus</i> ]                                                                                 | ↓ -4.90           |
| XP_667711    | hypothetical protein Chro.70604 [ <i>Cryptosporidium hominis</i> ]                                                                                     | ↓ -4.96           |
| ZP_01066446  | putative permease [ <i>Vibrio</i> sp.]                                                                                                                 | ↓ -5.13           |
| XP_696756    | PREDICTED: similar to sulfiredoxin 1 homolog [ <i>Danio rerio</i> ]                                                                                    | ↓ -5.26           |
| ABD33303     | hypothetical protein MtrDRAFT_AC158502g12v1 [ <i>Medicago truncatula</i> ]                                                                             | ↓ -5.32           |
| XP_388815    | hypothetical protein FG08639.1 [ <i>Gibberella zeae</i> PH-1]                                                                                          | ↓ -5.47           |
| CAE73165     | Hypothetical protein CBG20561 [ <i>Caenorhabditis briggsae</i> ]                                                                                       | ↓ -7.21           |
| XP_851407    | PREDICTED: similar to serine/cysteine proteinase inhibitor, clade I, member 2 isoform 1 [ <i>Canis familiaris</i> ]                                    | ↓ -9.10           |
| AAB01338     | EGF repeat transmembrane protein [ <i>Mus musculus</i> ]                                                                                               | ↓ -9.69           |
| AAH81106     | MGC83377 protein [ <i>Xenopus laevis</i> ]; solute carrier family 5 (sodium/glucose cotransporter),                                                    | ↓ -12.11          |

|             | member 2                                                                                                                   |                   |
|-------------|----------------------------------------------------------------------------------------------------------------------------|-------------------|
| EAT39824    | inorganic-stress: Fullerene nanoparticle, normal: Females-adult [ <i>Aedes aegypti</i> ]                                   | ↓ -17.08          |
| XP_420864   | T-cell surface glycoprotein CD8 alpha chain-like; PREDICTED: similar to CD8 alpha chain precursor [ <i>Gallus gallus</i> ] | ↓ -24.06          |
| AAP77784    | hypothetical protein HH_1187 [ <i>Helicobacter hepaticus</i> ]                                                             | ↓ -7396.75        |
| XP_700169   | PREDICTED: similar to conserved hypothetical protein [ <i>Danio rerio</i> ]                                                | ↓ -10187.81       |
| AAR01249    | laccase 8 [ <i>Coprinopsis cinerea</i> ]                                                                                   | ↓ -10930.12       |
| AAH00967    | NudC domain containing 1 [ <i>Homo sapiens</i> ]                                                                           | ↓ -11402.40       |
| XP_500810   | SEC16, ISOFORM F; hypothetical protein [ <i>Yarrowia lipolytica</i> ]                                                      | ↓ -13979.40       |
| AAQ75727    | NADH dehydrogenase I [ <i>Errhonus variabilis</i> ]                                                                        | ↓ -20664.18       |
| Gene ID     | Gene description [species]                                                                                                 | CBZ (fold change) |
| XP_784306   | PREDICTED: similar to placental protein 11 related [ <i>Strongylocentrotus purpuratus</i> ]                                | ↓ -29883.84       |
| ZP_01181739 | Phage minor structural protein, N-terminal [ <i>Bacillus cereus</i> subsp.]                                                | ↓ -35745.20       |
| XP_765680   | hypothetical protein TP01_0153 [ <i>Theileria parva</i> strain Muguga]                                                     | ↓ -59189.85       |
| AAM51523    | Hypothetical protein C28G1.6 [ <i>Caenorhabditis elegans</i> ]                                                             | ↓ -69117.57       |
| ZP_00851049 | hypothetical protein Shewana3DRAFT_1897 [ <i>Shewanella</i> sp.]                                                           | ↓ -98465.68       |
| XP_385040   | hypothetical protein FG04864.1 [ <i>Gibberella zeae</i> ]                                                                  | ↓ -109521.08      |
| XP_973845   | apoptosis-resistant E3 ubiquitin protein ligase 1 [ <i>Tribolium castaneum</i> ]                                           | ↓ -116578.52      |

## b) F12 generation

| Gene ID      | Gene description [species]                                                                               | CBZ (fold change) |
|--------------|----------------------------------------------------------------------------------------------------------|-------------------|
| EAA04403     | AGAP006931-PA; ENSANGP00000021782 [ <i>Anopheles gambiae</i> str. PEST]                                  | ↑ 72368.51        |
| YP_548045    | hypothetical protein Bpro_1196 [ <i>Polaromonas</i> sp.]                                                 | ↑ 71962.22        |
| EAL26781     | GA20714-PA [ <i>Drosophila pseudoobscura</i> ]                                                           | ↑ 56738.63        |
| CAD67790     | double stranded RNA-activated protein kinase 1 [ <i>Tetraodon nigroviridis</i> ]                         | ↑ 35149.50        |
| XP_827078    | hypothetical protein Tb09.160.5290 [ <i>Trypanosoma brucei</i> ]                                         | ↑ 28898.11        |
| XP_665805    | hypothetical protein Chro.60399 [ <i>Cryptosporidium hominis</i> ]                                       | ↑ 22473.06        |
| AAM74161     | Pax-6 protein [ <i>Euprymna scolopes</i> ]                                                               | ↑ 18679.08        |
| YP_476405    | ABC1 domain protein [ <i>Synechococcus</i> sp.]                                                          | ↑ 18288.22        |
| ABG52453     | peptidase M23B [ <i>Trichodesmium erythraeum</i> ]                                                       | ↑ 17199.64        |
| BAE56654     | unnamed protein product [ <i>Aspergillus oryzae</i> ]                                                    | ↑ 17137.55        |
| CAG76660     | conserved hypothetical protein [ <i>Erwinia carotovora</i> subsp. atroseptica]                           | ↑ 16193.51        |
| NP_008814    | NADH dehydrogenase subunit 6 [ <i>Mustelus manazo</i> ]                                                  | ↑ 15117.52        |
| XP_394766    | PREDICTED: similar to CG33175-PG, isoform G, partial [ <i>Apis mellifera</i> ]                           | ↑ 14893.60        |
| AAH88813     | lectin, galactoside-binding, soluble, 9B;; Lgals9-prov protein [ <i>Xenopus tropicalis</i> ]             | ↑ 14143.80        |
| EAR91277     | transmembrane protein, putative; hypothetical protein THERM_00784640 [ <i>Tetrahymena thermophila</i> ]  | ↑ 10882.44        |
| NP_922637    | hypothetical protein [ <i>Oryza sativa</i> (japonica cultivar-group)]                                    | ↑ 10539.98        |
| XP_765680    | hypothetical protein TP01_0153 [ <i>Theileria parva</i> strain Muguga]                                   | ↑ 10199.45        |
| NP_492661    | MUTator family member (mut-16) [ <i>Caenorhabditis elegans</i> ]                                         | ↑ 8548.91         |
| AAT64428     | pMGA 1.4 [ <i>Mycoplasma gallisepticum</i> ] haemagglutinin homologue                                    | ↑ 8363.90         |
| CAD51508     | asparagine--tRNA ligase, putative [ <i>Plasmodium falciparum</i> ]                                       | ↑ 7605.56         |
| ZP_00637578  | hypothetical protein SfriDRAFT_3544 [ <i>Shewanella frigidimarina</i> ]                                  | ↑ 5909.83         |
| ABB44488     | Suden_1210 hypothetical protein [ <i>Sulfurimonas denitrificans</i> ]                                    | ↑ 4916.25         |
| BAD94515     | peroxisome proliferator-activated receptor gamma [ <i>Oncorhynchus keta</i> ]                            | ↑ 4835.57         |
| AAY54998     | IP06749p [ <i>Drosophila melanogaster</i> ]                                                              | ↑ 3815.65         |
| AAH74846     | transmembrane protease, serine 3; Transmembrane protease, serine 3, isoform 1 [ <i>Homo sapiens</i> ]    | ↑ 3770.56         |
| XP_465194    | putative speckle-type POZ protein [ <i>Oryza sativa</i> (japonica cultivar-group)]                       | ↑ 3072.81         |
| P05842       | Putative noncapsid protein NS-1 (Nonstructural protein NS1) (NCVP1)                                      | ↑ 2264.67         |
| XP_001091323 | solute carrier family 15, member 5 [ <i>Macaca mulatta</i> ]                                             | ↑ 10.76           |
| XP_785823    | PREDICTED: similar to dispatched homolog 1 [ <i>Strongylocentrotus purpuratus</i> ]                      | ↑ 9.43            |
| BAD74252     | type IIs restriction endonuclease; type IIs restriction endonuclease [ <i>Geobacillus kaustophilus</i> ] | ↑ 7.78            |
| XP_430000    | PREDICTED: hypothetical protein [ <i>Gallus gallus</i> ]                                                 | ↑ 7.35            |
| XP_981685    | PREDICTED: hypothetical protein [ <i>Mus musculus</i> ]                                                  | ↑ 6.23            |
| XP_001069615 | PREDICTED: similar to YY1 transcription factor [ <i>Rattus norvegicus</i> ]                              | ↑ 6.15            |
| ZP_01001041  | LacI family regulatory protein [ <i>Oceanicola batsensis</i> ]                                           | ↑ 5.16            |
| AAY66970     | secreted protein [ <i>Ixodes scapularis</i> ]                                                            | ↑ 3.37            |

| XP_001063788 | Keratin associated protein 20-like 2 [ <i>Rattus norvegicus</i> (Norway rat)]                                                         | ↑ 3.29            |
|--------------|---------------------------------------------------------------------------------------------------------------------------------------|-------------------|
| AAH70339     | Deoxyuridine triphosphatase DUT [ <i>Homo sapiens</i> ]                                                                               | ↑ 3.21            |
| CAC95124     | TIR/NBS/LRR protein [ <i>Populus deltoides</i> ]                                                                                      | ↑ 3.09            |
| EAT41358     | AAEL007022-PA [ <i>Aedes aegypti</i> (yellow fever mosquito)]                                                                         | ↑ 2.80            |
| AAK52091     | Cth cystathionine gamma-lyase [ <i>Rattus norvegicus</i> (Norway rat)]                                                                | ↑ 2.74            |
| XP_746198    | PC001062.02.0 hypothetical protein [ <i>Plasmodium chabaudi chabaudii</i> ]                                                           | ↑ 2.71            |
| T44130       | hypothetical protein [imported] - [ <i>Staphylococcus aureus</i> ] (fragment)                                                         | ↑ 2.63            |
| XP_813347    | UDP-glucuronosyl and UDP-glucosyl transferase [ <i>Trypanosoma cruzi</i> strain CL Brener]                                            | ↑ 2.42            |
| XP_541754    | guanyl-nucleotide exchange factor [ <i>Canis familiaris</i> ]                                                                         | ↑ 2.40            |
| XP_969056    | ubiquitin carboxyl-terminal hydrolase 14 [ <i>Tribolium castaneum</i> (red flour beetle)]                                             | ↑ 2.40            |
| ZP_01376161  | hypothetical protein Ccur5_01001129 [ <i>Campylobacter curvus</i> ]                                                                   | ↑ 2.29            |
| XP_974201    | PREDICTED: 39S ribosomal protein L44, mitochondrial [ <i>Tribolium castaneum</i> ]                                                    | ↑ 2.25            |
| Gene ID      | Gene description [species]                                                                                                            | CBZ (Fold change) |
| AAZ75599     | CRISP-ENH2 [ <i>Pseudoferania polylepis</i> ]                                                                                         | ↑ 2.13            |
| XP_971017    | PREDICTED: zinc transporter ZIP11 isoform X2 [ <i>Tribolium castaneum</i> ]                                                           | ↑ 2.08            |
| AAH74592     | MGC69530 protein [ <i>Xenopus (Silurana) tropicalis</i> ]                                                                             | ↑ 2.01            |
| P34724       | RecName: Full=Acid phosphatase; Flags: Precursor [ <i>Aspergillus niger</i> ]                                                         | ↑ 2.00            |
| XP_393267    | PREDICTED: testican-1-like [ <i>Apis mellifera</i> ]                                                                                  | ↑ 1.95            |
| XP_966285    | DNA polymerase epsilon catalytic subunit A [ <i>Plasmodium falciparum</i> ]                                                           | ↑ 1.72            |
| Gene ID      | Gene description [species]                                                                                                            | CBZ (Fold change) |
| CAE73165     | Hypothetical protein CBG20561 [ <i>Caenorhabditis briggsae</i> ]                                                                      | ↓ -2.61           |
| XP_651175    | chloride channel protein 2[ <i>Entamoeba histolytica</i> ]                                                                            | ↓ -2.91           |
| EAA08389     | AGAP003192-PA [ <i>Anopheles gambiae</i> str. PEST]                                                                                   | ↓ -3.05           |
| ABE93099     | hypothetical protein MtrDRAFT_AC122172g1v2 [ <i>Medicago truncatula</i> ]                                                             | ↓ -3.44           |
| CAF89999     | unnamed protein product [ <i>Tetraodon nigroviridis</i> ]                                                                             | ↓ -3.73           |
| NP_440283    | histidinol dehydrogenase [ <i>Synechocystis</i> sp]                                                                                   | ↓ -3.76           |
| I30010       | SMU_1069c hypothetical protein [ <i>Streptococcus mutans</i> UA159 ]                                                                  | ↓ -3.77           |
| EAT43025     | mothers against dpp protein [ <i>Aedes aegypti</i> (yellow fever mosquito)]                                                           | ↓ -3.90           |
| XP_581858    | PREDICTED: similar to Valyl-tRNA synthetase (Valine--tRNA ligase) (ValRS) (G7a protein) [ <i>Bos taurus</i> ]                         | ↓ -3.92           |
| XP_975669    | PREDICTED: hypothetical protein [ <i>Tribolium castaneum</i> ]                                                                        | ↓ -3.97           |
| XP_973543    | polypeptide N-acetylgalactosaminyltransferase 5 [ <i>Tribolium castaneum</i> (red flour beetle)]                                      | ↓ -3.97           |
| EAT34457     | conserved hypothetical protein [ <i>Aedes aegypti</i> ]                                                                               | ↓ -4.01           |
| XP_678020    | hypothetical protein [ <i>Plasmodium berghei</i> ANKA]                                                                                | ↓ -4.07           |
| XP_710938    | Potential fungal zinc cluster transcription factorspecies: Candida albicans/putative transcription factor [ <i>Candida albicans</i> ] | ↓ -4.12           |
| XP_640018    | hypothetical protein [ <i>Dictyostelium discoideum</i> AX4]                                                                           | ↓ -4.13           |
| YP_547797    | hypothetical protein Bpro_0943 [ <i>Polaromonas</i> sp.]                                                                              | ↓ -4.38           |
| ABB06938     | FAD dependent oxidoreductase [ <i>Burkholderia lata</i> ]                                                                             | ↓ -4.42           |
| NP_571006    | solute carrier family 39 (zinc transporter), member 7 [ <i>Danio rerio</i> (zebrafish)]                                               | ↓ -4.56           |
| XP_956378    | hypothetical protein [ <i>Neurospora crassa</i> OR74A]                                                                                | ↓ -4.64           |
| EAA08205     | AGAP002490-PA [ <i>Anopheles gambiae</i> str. PEST]                                                                                   | ↓ -4.67           |
| AAA29908     |                                                                                                                                       |                   |
