# Supplementary material for: Daphnia magna Multigeneration Exposure to Carbendazim: Gene Transcription Responses
Source: MDPI journal article supplement (doi:10.3390/toxics11110918), 2023-11-10
Supplement: s1 [file s1]

SUPPLEMENTARY MATERIAL

***Daphnia magna* multigeneration exposure to carbendazim: gene transcription responses**

Ana Rita R. Silva<sup>a</sup>, Patrícia V. Silva<sup>a</sup>, Ana Raquel Soares<sup>b</sup>, M. Nazaret González-Alcaraz<sup>c</sup>,  
Cornelis A.M. van Gestel<sup>d</sup>, Dick Roelofs<sup>e</sup>, Gabriela Moura<sup>b</sup>, Amadeu M. V. M. Soares<sup>a</sup>  
and Susana Loureiro<sup>a</sup>

<sup>a</sup>Department of Biology & CESAM, University of Aveiro, 3810-193, Portugal

<sup>b</sup>Department of Medical Sciences & Institute for Biomedicine (iBiMED), University of Aveiro, 3810-193  
Aveiro, Portugal

<sup>c</sup>Department of Agricultural Engineering of the E.T.S.I.A. & Soil Ecology and Biotechnology Unit of the  
Institute of Plant Biotechnology, Technical University of Cartagena, 30203, Cartagena, Spain

<sup>d</sup>Department of Ecological Science, Faculty of Science, Vrije Universiteit Amsterdam, The Netherlands

<sup>e</sup>Keygene N.V., Agro Business Park 90, 6708 PW Wageningen, The Netherlands

## Daphnids in clean medium (Control)

**1) Multigenerational experiment (F0 to F12):** 1 L glass vessels, 3 replicates, 20 *Daphnia magna* each.

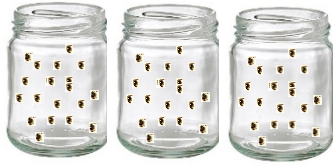

At F0 and F12, *D. magna* neonates (<24h) were randomly collected from these 3 vessels and moved to new vessels:

**2) Gene transcription analysis (F0 and F12):** 150 mL glass vessels, 3 replicates, 5 *D. magna* each.

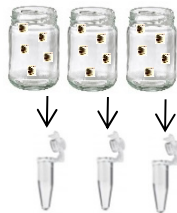

After 10 days, the 5 daphnids were pooled together per replicate - shock-frozen in liquid nitrogen and stored at -80°C until RNA extraction.

## Daphnids in carbendazim (5 $\mu\text{g L}^{-1}$ )

**1) Multigenerational experiment (F0 to F12):** 1 L glass vessels, 3 replicates, 20 *Daphnia magna* each.

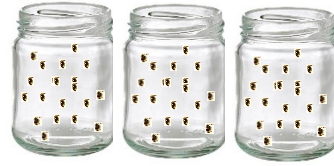

At F0 and F12, *D. magna* neonates (<24h) were randomly collected from these 3 vessels and moved to new vessels:

**2) Gene transcription analysis (F0 and F12):** 150 mL glass vessels, 3 replicates, 5 *D. magna* each.

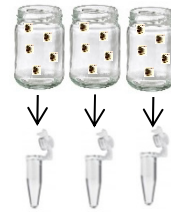

After 10 days, the 5 daphnids were pooled together per replicate - shock-frozen in liquid nitrogen and stored at -80°C until RNA extraction.

**Figure S1.** Details of the experimental design of the 1) multigenerational experiment and 2) gene transcription analysis. F represents generation. Note: when moved to new vessels, daphnids were maintained in the same conditions (clean daphnids in clean medium; carbendazim daphnids in carbendazim).

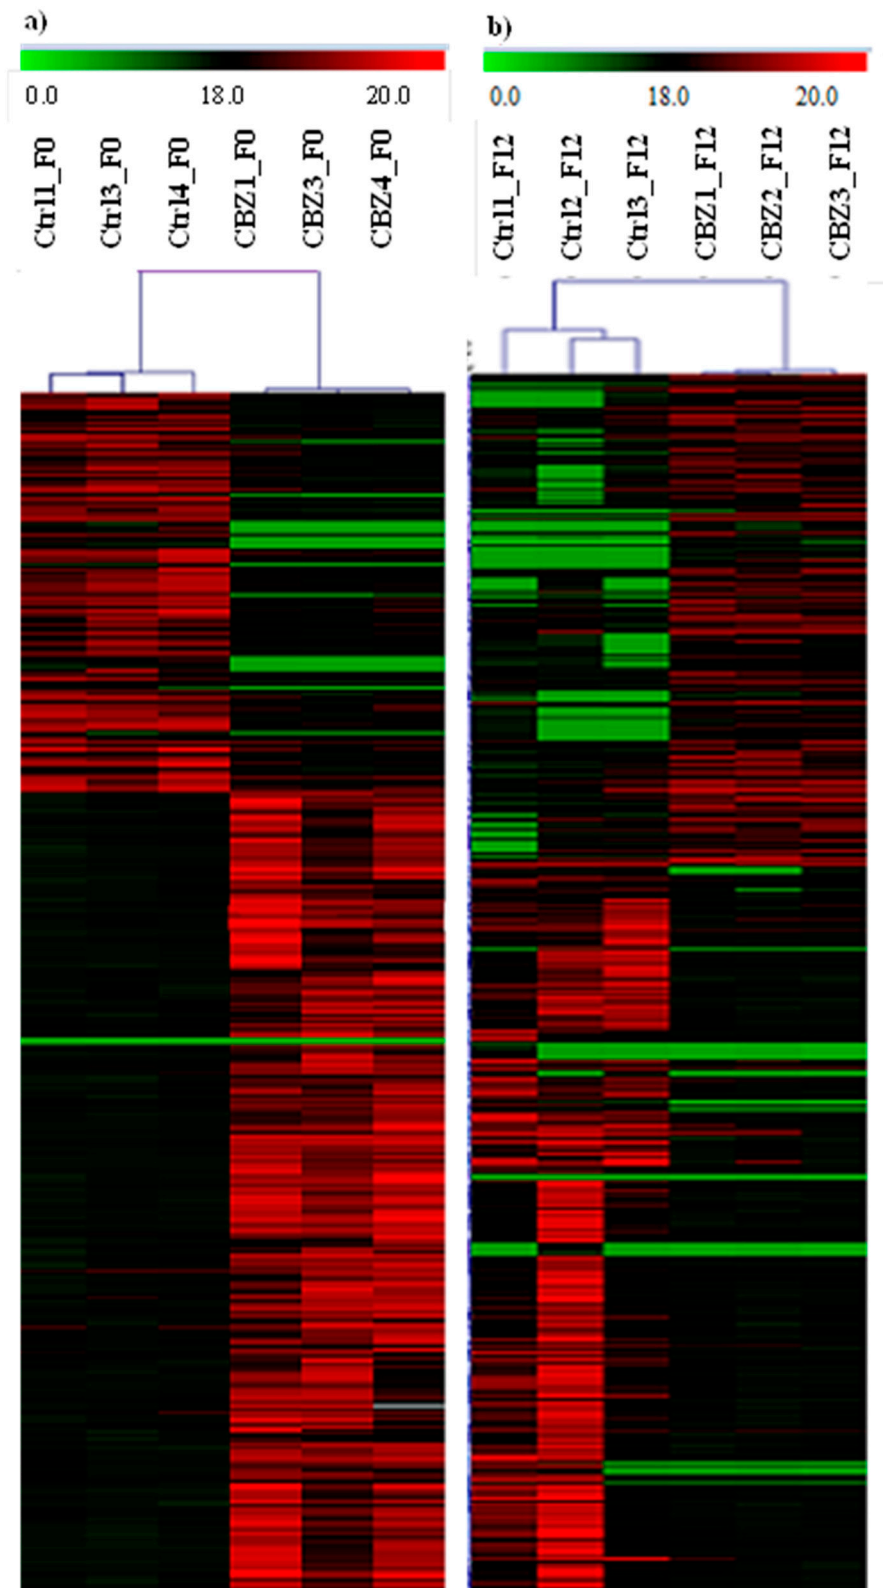

**Figure S2.** Hierarchical clustering of statistically significantly expressed genes of *Daphnia magna* exposed to 5  $\mu\text{g L}^{-1}$  carbendazim (CBZ) compared with clean medium (controls, Ctrl): **a)** F0 generation, and **b)** F12 generation. A clear separation and clustering between clean medium conditions and carbendazim exposure is observed, with green shading indicating less expressed genes and red shading indicating highly expressed genes.
